# Supplementary material for: GWAS of resistance to three bacterial diseases in the Andean common bean diversity panel
Source: Front Plant Sci. 2024 Sep 5;15:1469381. doi: 10.3389/fpls.2024.1469381 (PMC11410698; doi:10.3389/fpls.2024.1469381)
Supplement: Supplementary file 1 [file Table1.xlsx]

## Sheet: Table S1
Table S1. Structure analysis of 468 ADP accessions, K=3 for Andean (G1-G2) and Middle American gene pools, using a membership coefficient of Q≥0.6
Cons	Id. ADP	Id. Name	Id.Name	Cicky et al., 2015	Region	Source	Country of Origin	Phaseolin	Q1	Q2	Q3	Structure_K3(>75%)	Type	Habit	Origin	Note
1	ADP001	ROZI_KOKO	ROZI_KOKO	ADP001	Africa	US GRIN	Tanzania	.	0.8348	0.1652	0	Andean (G1)	red spec	Bush	Africa	High yield SA
2	ADP002	W6_16444	W6_16444	ADP002	Africa	US GRIN	Tanzania	.	1	0	0	Andean (G1)	Purple speckled	Bush	Africa
3	ADP003	KIDUNGU	KIDUNGU	ADP003	Africa	US GRIN	Tanzania	.	0.999	0.001	0	Andean (G1)	red	Bush	Africa
4	ADP004	KILOMBERO	KILOMBERO	ADP004	Africa	US GRIN	Tanzania	.	0.9781	0.0219	0	Andean (G1)	yel brn zebra	Bush	Africa	High yield in TZ;High yield Roza
5	ADP005	KABUKU	KABUKU	ADP005	Africa	US GRIN	Tanzania	.	1	0	0	Andean (G1)	red	Bush	Africa
6	ADP006	W6_16465	W6_16465	ADP006	Africa	US GRIN	Tanzania	.	0.999	0.001	0	Andean (G1)	red	Bush	Africa	drought
7	ADP007	BUKOBA	BUKOBA	ADP007	Africa	US GRIN	Tanzania	.	0.629	0	0.371	Andean (G1)_Admixtured	yellow	Bush	Africa	High yield in TZ
8	ADP008	Nyayo	Nyayo	ADP008	Africa	US GRIN	Tanzania	.	0.001	0.999	0	Andean (G2)	red mottled	Bush	Africa
9	ADP009	Maalasa	Maalasa	ADP009	Africa	US GRIN	Tanzania	.	0.0039	0.9961	0	Andean (G2)	red mottled	Bush	Africa
10	ADP010	CANADA	CANADA	ADP010	Africa	US GRIN	Tanzania	.	0.999	0.001	0	Andean (G1)	red	Bush	Africa	High yield in TZ;drought;High yield Roza;BNF;drought
11	ADP011	KIBOROLONI	KIBOROLONI	ADP011	Africa	US GRIN	Tanzania	.	0.999	0.001	0	Andean (G1)	red	Bush	Africa
12	ADP012	W6_16489	W6_16489	NO	Africa	.	.	.	0.998	0.002	0	Andean (G1)	red	Bush	Africa	High yield SA
13	ADP013	KIBUMBULA	KIBUMBULA	ADP013	Africa	US GRIN	Tanzania	.	0.998	0.002	0	Andean (G1)	red	Bush	Africa	High yield in TZ
14	ADP014	KIANGWE	KIANGWE	ADP014	Africa	US GRIN	Tanzania	.	0.9822	0.001	0.0168	Andean (G1)	yellow	Bush	Africa	High yield in TZ;Rust resistant
15	ADP015	W6_16495	W6_16495	ADP015	Africa	US GRIN	Tanzania	.	0.999	0.001	0	Andean (G1)	red	Bush	Africa
16	ADP016	GOLOLI	GOLOLI	ADP016	Africa	US GRIN	Tanzania	.	0.999	0.001	0	Andean (G1)	red	Bush	Africa	drought
17	ADP017	W6_16529	W6_16529	ADP017	Africa	US GRIN	Tanzania	.	0.999	0.001	0	Andean (G1)	red	Bush	Africa
18	ADP018	SODAN	SODAN	ADP018	Africa	US GRIN	Tanzania	.	0.9931	0.0069	0	Andean (G1)	red	Bush	Africa	High yield SA;Drought
19	ADP019	KASUKANYWELE	KASUKANYWELE	ADP019	Africa	US GRIN	Tanzania	.	0.999	0.001	0	Andean (G1)	zebra	Bush	Africa	High yield in TZ
20	ADP020	KIGOMA	KIGOMA	ADP020	Africa	US GRIN	Tanzania	.	0.999	0.001	0	Andean (G1)	yellow	Bush	Africa
21	ADP021	MBULAMTWE	MBULAMTWE	ADP021	Africa	US GRIN	Tanzania	.	0.999	0.001	0	Andean (G1)	yellow	Bush	Africa
22	ADP022	KISAPURI	KISAPURI	ADP022	Africa	US GRIN	Tanzania	.	0.998	0.001	0.001	Andean (G1)	red	Bush	Africa	Rust resistant
23	ADP023	MSHORONYLONI	MSHORONYLONI	ADP023	Africa	US GRIN	Tanzania	.	0.999	0.001	0	Andean (G1)	red	Bush	Africa
24	ADP024	YELLOW	YELLOW	ADP024	Africa	US GRIN	Tanzania	.	0.947	0.001	0.052	Andean (G1)	yellow	Bush	Africa
25	ADP025	RUHONDELA	RUHONDELA	ADP025	Africa	US GRIN	Tanzania	.	1	0	0	Andean (G1)	Purple speckled	Bush	Africa
26	ADP026	Black_Wonder	Black_Wonder	ADP026	Africa	US GRIN	Tanzania	.	0.817	0	0.183	Andean (G1)	black	Bush	Africa
27	ADP027	Incomparable	Incomparable	ADP027	Africa	US GRIN	Tanzania	.	0.967	0.001	0.032	Andean (G1)	brown	Bush	Africa	High yield Roza
28	ADP028	Sisi	Sisi	ADP028	Africa	US GRIN	Tanzania	.	0.956	0.001	0.043	Andean (G1)	yellow	Bush	Africa
29	ADP029	RH2	RH2	ADP029	Africa	US GRIN	Tanzania	.	0.998	0.002	0	Andean (G1)	red	Bush	Africa
30	ADP030	RHNo.6	RHNo.6	ADP030	Africa	US GRIN	Tanzania	.	0	0.6606	0.3394	Andean (G2)_Admixtured	black	Bush	Africa
31	ADP031	RH11	RH11	ADP031	Africa	US GRIN	Tanzania	.	0.999	0.001	0	Andean (G1)	red	Bush	Africa	High yield in TZ
32	ADP032	RHNo.21	RHNo.21	ADP032	Africa	US GRIN	Tanzania	.	0.0196	0.8404	0.14	Andean (G2)	brown	Bush	Africa
33	ADP033	KIJIVU	KIJIVU	ADP033	Africa	US GRIN	Tanzania	.	0.999	0.001	0	Andean (G1)	Purple speckled	Bush	Africa	High yield in TZ;drought;High yield Roza
34	ADP034	KIJIVU	KIJIVU	ADP034	Africa	US GRIN	Tanzania	.	0.9826	0.0174	0	Andean (G1)	Purple speckled	Bush	Africa
35	ADP035	Kokola	Kokola	ADP035	Africa	US GRIN	Tanzania	.	0	1	0	Andean (G2)	red mottled	Bush	Africa	Heat tolerant;High yield in TZ;Drought;low fert
36	ADP036	Lyamungu85	Lyamungu85	ADP036	Africa	US GRIN	Tanzania	.	0	1	0	Andean (G2)	red mottled	Bush	Africa
37	ADP037	W6_16488	W6_16488	ADP037	Africa	US GRIN	Tanzania	.	0.994	0.005	0.001	Andean (G1)	brown	Bush	Africa	High yield in TZ;drought;High yield Roza
38	ADP038	Moono	Moono	ADP038	Africa	US GRIN	Tanzania	.	0.9994	0.0006	0	Andean (G1)	red	Bush	Africa	High yield in TZ;High yield Roza
39	ADP041	MRONDO	MRONDO	ADP041	Africa	US GRIN	Tanzania	.	0.9217	0.0018	0.0765	Andean (G1)	red	Vine	Africa	High yield in TZ;High yield Roza;Drought
40	ADP042	MKOKOLA	MKOKOLA	ADP042	Africa	US GRIN	Tanzania	.	0.9509	0.0009	0.0482	Andean (G1)	red	Vine	Africa	drought;High yield Roza
41	ADP043	BWANA_SHAMBA	BWANA_SHAMBA	ADP043	Africa	US GRIN	Tanzania	.	0.9759	0.0001	0.024	Andean (G1)	red	Vine	Africa	High yield SA
42	ADP044	KIJIVU	KIJIVU	ADP044	Africa	US GRIN	Tanzania	.	0.9979	0.0021	0	Andean (G1)	Purple speckled	Vine	Africa
43	ADP045	RH12	RH12	ADP045	Africa	US GRIN	Tanzania	.	0.999	0.001	0	Andean (G1)	Purple speckled	Vine	Africa	Rust resistant
44	ADP046	RH4	RH4	NO	Africa	.	.	.	0.998	0.002	0	Andean (G1)	red	Ag. Climber	Africa	High yield in TZ;High yield Roza
45	ADP047	MSOLINI	MSOLINI	ADP047	Africa	US GRIN	Tanzania	.	0.999	0.001	0	Andean (G1)	brown	Vine	Africa
46	ADP048	W6_6534	W6_6534	ADP048	Africa	US GRIN	Tanzania	.	0.999	0.001	0	Andean (G1)	red	Ag. Climber	Africa	Rust resistant;ALS resistant;Disease index resistant;High yield Roza
47	ADP049	W6_16546	W6_16546	ADP049	Africa	US GRIN	Tanzania	.	0.998	0.002	0	Andean (G1)	red	Vine	Africa	drought
48	ADP050	SALUNDE	SALUNDE	ADP050	Africa	US GRIN	Tanzania	.	0.9524	0.0006	0.047	Andean (G1)	gray	Vine	Africa
49	ADP051	RH3	RH3	ADP051	Africa	US GRIN	Tanzania	.	0.9967	0.0033	0	Andean (G1)	Purple speckled	Vine	Africa	Rust resistant;High yield Roza
50	ADP052	RH9	RH9	ADP052	Africa	US GRIN	Tanzania	.	0.999	0.001	0	Andean (G1)	Purple speckled	Ag. Climber	Africa
51	ADP053	MAHARAGE_MAKUBWA	MAHARAGE_MAKUBWA	ADP053	Africa	US GRIN	Tanzania	.	0.998	0.002	0	Andean (G1)	red	Ag. Climber	Africa	High yield Roza
52	ADP054	W6_16447	W6_16447	ADP054	Africa	US GRIN	Tanzania	.	0.975	0.001	0.024	Andean (G1)	Cranberry	Vine	Africa	High yield Roza
53	ADP055	KABUKU	KABUKU	ADP055	Africa	US GRIN	Tanzania	.	0.8938	0.1061	0.0001	Andean (G1)	red spec	Vine	Africa	drought;High yield Roza
54	ADP056	SOYA	SOYA	ADP056	Africa	US GRIN	Tanzania	.	0.999	0.001	0	Andean (G1)	Purple speckled	Vine	Africa	drought
55	ADP057	KIJIVU	KIJIVU	ADP057	Africa	US GRIN	Tanzania	.	0.9807	0	0.0193	Andean (G1)	red	Vine	Africa	High yield in TZ;drought;High yield SA
56	ADP058	CANADA	CANADA	ADP058	Africa	US GRIN	Tanzania	.	0.999	0.001	0	Andean (G1)	red	Vine	Africa	High yield Roza
57	ADP059	Poto	Poto	ADP059	Africa	US GRIN	Tanzania	.	1	0	0	Andean (G1)	Purple speckled	Ag. Climber	Africa
58	ADP060	CANADA	CANADA	ADP060	Africa	US GRIN	Tanzania	.	0.942	0.001	0.057	Andean (G1)	red	Vine	Africa	High yield SA
59	ADP061	Maulasi	Maulasi	ADP061	Africa	US GRIN	Tanzania	.	0.9468	0.001	0.0522	Andean (G1)	brn cran	Bush	Africa	drought
60	ADP062	MAULASI	MAULASI	ADP062	Africa	US GRIN	Tanzania	.	0.999	0.001	0	Andean (G1)	red spec	Vine	Africa
61	ADP063	Soya	Soya	ADP063	Africa	US GRIN	Tanzania	.	0.9928	0.0072	0	Andean (G1)	Purple speckled	Ag. Climber	Africa	drought
62	ADP064	W6_16500	W6_16500	ADP064	Africa	US GRIN	Tanzania	.	0.9741	0.0249	0.001	Andean (G1)	yellow	Vine	Africa	High yield SA
63	ADP065	W6_16501	W6_16501	ADP065	Africa	US GRIN	Tanzania	.	0.9703	0.0222	0.0075	Andean (G1)	red	Vine	Africa
64	ADP066	NJANO	NJANO	ADP066	Africa	US GRIN	Tanzania	.	0.988	0.01	0.002	Andean (G1)	yellow	Vine	Africa
65	ADP067	NJANO	NJANO	ADP067	Africa	US GRIN	Tanzania	.	0.9842	0.0018	0.014	Andean (G1)	yellow	Ag. Climber	Africa
66	ADP068	Soya	Soya	ADP068	Africa	US GRIN	Tanzania	.	0.9994	0.0006	0	Andean (G1)	Purple speckled	Ag. Climber	Africa
67	ADP069	SOYA	SOYA	ADP069	Africa	US GRIN	Tanzania	.	1	0	0	Andean (G1)	Purple speckled	Vine	Africa	Rust resistant
68	ADP070	Msafiri	Msafiri	ADP070	Africa	US GRIN	Tanzania	.	0.9948	0.0052	0	Andean (G1)	red	Vine	Africa
69	ADP071	NJANO_DOLEA	NJANO_DOLEA	ADP071	Africa	US GRIN	Tanzania	.	0.97	0.001	0.029	Andean (G1)	gray	Vine	Africa	High yield in TZ
70	ADP072	MASUSU	MASUSU	ADP072	Africa	US GRIN	Tanzania	.	0.985	0.001	0.014	Andean (G1)	brown	Vine	Africa
71	ADP073	MASUSU	MASUSU	ADP073	Africa	US GRIN	Tanzania	.	0.999	0.001	0	Andean (G1)	brown	Vine	Africa
72	ADP074	KABLANKETI	KABLANKETI	ADP074	Africa	US GRIN	Tanzania	.	0.985	0.015	0	Andean (G1)	Purple speckled	Vine	Africa
73	ADP075	MABUKU	MABUKU	ADP075	Africa	US GRIN	Tanzania	.	0.999	0.001	0	Andean (G1)	brown	Vine	Africa	High yield SA
74	ADP076	KABLANKETI	KABLANKETI	ADP076	Africa	US GRIN	Tanzania	.	1	0	0	Andean (G1)	Purple speckled	Vine	Africa
75	ADP077	NAMWANGA	NAMWANGA	ADP077	Africa	US GRIN	Tanzania	.	0	0.909	0.091	Andean (G2)	Purple speckled	Ag. Climber	Africa
76	ADP078	W6_16535	W6_16535	NO	Africa	.	.	.	0.996	0.003	0.001	Andean (G1)	maroon spec	Ag. Climber	Africa
77	ADP079	LUNGEMBA	LUNGEMBA	ADP079	Africa	US GRIN	Tanzania	.	0.9608	0.0017	0.0375	Andean (G1)	Purple speckled	Ag. Climber	Africa
78	ADP080	KABLANKETI	KABLANKETI	ADP080	Africa	US GRIN	Tanzania	.	0.6062	0	0.3938	Andean (G1)_Admixtured	Purple speckled	Vine	Africa	HBB resistant;drought;High yield SA;High yield Roza
79	ADP081	KABLANKETI	KABLANKETI	ADP081	Africa	US GRIN	Tanzania	.	0.739	0	0.261	Andean (G1)_Admixtured	Purple speckled	Vine	Africa	drought
80	ADP082	KABLANKETI	KABLANKETI	ADP082	Africa	US GRIN	Tanzania	.	0.977	0.001	0.022	Andean (G1)	Purple speckled	Ag. Climber	Africa
81	ADP083	W6_16547	W6_16547	ADP083	Africa	US GRIN	Tanzania	.	0.9335	0.0005	0.066	Andean (G1)	Purple speckled	Ag. Climber	Africa
82	ADP084	KABLANKETI_NDEFU	KABLANKETI_NDEFU	ADP084	Africa	US GRIN	Tanzania	.	0.5679	0.0001	0.432	Andean (G1)_Admixtured	drk purp spec	Ag. Climber	Africa	High yield in TZ;HBB resistant;PP;Disease index resistant
83	ADP085	KABLANKETI	KABLANKETI	ADP085	Africa	US GRIN	Tanzania	.	0.999	0.001	0	Andean (G1)	Purple speckled	Ag. Climber	Africa
84	ADP086	NYAMHONGA_MWEKUNDU	NYAMHONGA_MWEKUNDU	ADP086	Africa	US GRIN	Tanzania	.	0.92	0.001	0.079	Andean (G1)	Purple speckled	Ag. Climber	Africa
85	ADP087	KABLANKETI	KABLANKETI	ADP087	Africa	US GRIN	Tanzania	.	0.999	0.001	0	Andean (G1)	Purple speckled	Vine	Africa
86	ADP088	KABLANKETI	KABLANKETI	ADP088	Africa	US GRIN	Tanzania	.	0.998	0	0.002	Andean (G1)	Purple speckled	Vine	Africa
87	ADP089	KABLANKETI	KABLANKETI	ADP089	Africa	US GRIN	Tanzania	.	0.998	0	0.002	Andean (G1)	Purple speckled	Vine	Africa
88	ADP090	KASUKANYWELE	KASUKANYWELE	ADP090	Africa	US GRIN	Tanzania	.	0.999	0.001	0	Andean (G1)	zebra	Vine	Africa	Rust resistant
89	ADP092	MORO	MORO	ADP092	Africa	US GRIN	Tanzania	.	0.9447	0.0003	0.055	Andean (G1)	yellow	Vine	Africa
90	ADP093	MORO	MORO	ADP093	Africa	US GRIN	Tanzania	.	0.996	0.001	0.003	Andean (G1)	yellow	Vine	Africa
91	ADP094	LUSHALA	LUSHALA	ADP094	Africa	US GRIN	Tanzania	.	0.999	0	0.001	Andean (G1)	yellow	Vine	Africa
92	ADP095	CANADA	CANADA	ADP095	Africa	US GRIN	Tanzania	.	0.999	0.001	0	Andean (G1)	zebra	Vine	Africa
93	ADP096	Rojo	Rojo	ADP096	Africa	Tanzania breeding	Tanzania	.	0.8859	0	0.1141	Andean (G1)	red	Bush	Africa
94	ADP098	Selian97	Selian97	ADP098	Africa	Tanzania breeding	Tanzania	.	0.7077	0.2923	0	Andean (G1)_Admixtured	red	Bush	Africa	Rust resistant
95	ADP099	BwanaShamba	BwanaShamba	ADP099	Africa	Tanzania breeding	Tanzania	.	0.999	0.001	0	Andean (G1)	red	Bush	Africa	High yield SA
96	ADP100	EG21	EG21	ADP100	Africa	Tanzania breeding	Tanzania	.	0.9122	0.0008	0.087	Andean (G1)	pur mot	Bush	Africa	High yield SA
97	ADP101	Witrood	Witrood	ADP101	Africa	Tanzania breeding	.	.	0.937	0.001	0.062	Andean (G1)	Cranberry	Bush	Africa
98	ADP102	Jesca	Jesca	ADP102	Africa	Tanzania breeding	Tanzania	.	0.999	0.001	0	Andean (G1)	pur mot	Bush	Africa	High yield in TZ;drought;
99	ADP103	Pesa	Pesa	ADP103	Africa	Tanzania breeding	Tanzania	.	0.9054	0.0006	0.094	Andean (G1)	red	Bush	Africa
100	ADP104	Wiamwngu	Wiamwngu	ADP104	Africa	Tanzania breeding	Tanzania	.	0	1	0	Andean (G2)	seg spec pur spec red	Bush	Africa
101	ADP105	Sewani_97	Sewani_97	ADP105	Africa	Tanzania breeding	Tanzania	.	0.8493	0.1507	0	Andean (G1)	red	Bush	Africa
102	ADP106	Zawadi	Zawadi	ADP106	Africa	Tanzania breeding	Tanzania	.	0.908	0	0.092	Andean (G1)	pur mot	Bush	Africa	High yield in TZ
103	ADP107	Mishindi	Mishindi	ADP107	Africa	Tanzania breeding	Tanzania	.	0.938	0	0.062	Andean (G1)	pur mot	Bush	Africa	High yield Roza;Drought
104	ADP108	Njano	Njano	ADP108	Africa	Tanzania breeding	Tanzania	.	0.999	0.001	0	Andean (G1)	yellow	Vine	Africa
105	ADP109	Kablanketi	Kablanketi	ADP109	Africa	Tanzania breeding	Tanzania	.	1	0	0	Andean (G1)	pur mot	Vine	Africa	drought;High yield Roza
106	ADP110	SUG131	SUG131	ADP110	Africa	Tanzania breeding	.	.	0.8697	0.1303	0	Andean (G1)	Cranberry	Vine	Africa
107	ADP111	Uyole98	Uyole98	ADP111	Africa	Tanzania breeding	Tanzania	.	0.7412	0.092	0.1669	Andean (G1)_Admixtured	yellow	Vine	Africa
108	ADP112	Uyole96	Uyole96	ADP112	Africa	Tanzania breeding	Tanzania	.	0.999	0.001	0	Andean (G1)	red	Vine	Africa	drought
109	ADP113	OPS-RS4	OPS-RS4	ADP113	Africa	S. Africa breeding	South Africa	.	0	0.897	0.103	Andean (G2)	Cranberry	Vine	Africa	High yield in TZ;High yield Roza
110	ADP114	OPS_RS1	OPS_RS1	ADP114	Africa	S. Africa breeding	South Africa	.	0.9229	0.0209	0.0562	Andean (G1)	Cranberry	Vine	Africa	HBB resistant;drought;High yield Roza
111	ADP115	Bonus	Bonus	ADP115	Africa	S. Africa breeding	South Africa	.	0.9328	0.002	0.0652	Andean (G1)	Cranberry	Vine	Africa
112	ADP117	A483	A483	ADP117	Africa	CIAT breeding	.	.	0.6622	0.1298	0.208	Andean (G1)_Admixtured	pur mot	Vine	Africa
113	ADP118	Werna	Werna	ADP118	Africa	S. Africa breeding	South Africa	.	0.911	0.001	0.088	Andean (G1)	Cranberry	Vine	Africa	CBB VAX derived;HBB resistant
114	ADP119	A193	A193	ADP119	Africa	CIAT breeding	.	.	0.7173	0.2827	0	Andean (G1)_Admixtured	spec red	Vine	Africa	Rust resistant;Disease index resistant
115	ADP120	Tygerberg	Tygerberg	ADP120	Africa	S. Africa breeding	South Africa	.	0.8013	0.0997	0.099	Andean (G1)	Cranberry	Vine	Africa	HBB resistant;Disease index resistant
116	ADP121	KranskopHR-1	KranskopHR-1	ADP121	Africa	S. Africa breeding	South Africa	.	0	0.8899	0.1101	Andean (G2)	Cranberry	Vine	Africa	HBB resistant
117	ADP122	Kranskop	Kranskop	ADP122	Africa	S. Africa breeding	South Africa	.	0.9802	0.001	0.0188	Andean (G1)	Cranberry	Vine	Africa
118	ADP123	Jenny	Jenny	ADP123	Africa	Tanzania breeding	South Africa	.	0.7454	0.002	0.2526	Andean (G1)_Admixtured	Cranberry	Vine	Africa	HBB resistant
119	ADP124	Mani	Mani	ADP124	Africa	Tanzania breeding	Tanzania	.	0	0.99	0.01	Andean (G2)	red	Vine	Africa
120	ADP166	NABE 4	NABE4	ADP166	Africa	CIAT breeding	Uganda	.	0.001	0.999	0	Andean (G2)	red mottled	Bush	Africa	High yield SA
121	ADP168	KANYEBWA	KANYEBWA	NO	Africa	.	.	.	0.0019	0.9981	0	Andean (G2)	pink cran	Vine	Africa	High yield SA
122	ADP172	AFC-4	ADP172	NO	Africa	.	.	.	0.2233	0	0.7767	﻿Middle-American	NA	Ag. Climber	Africa
123	ADP180	G433	G433	ADP180	Europe	CIAT core	Turkey	H	0	0.945	0.055	Andean (G2)	Cranberry	Bush	CIAT core
124	ADP183	G994	G994	NO	Europe	CIAT core	Spain	H	0.7945	0.1436	0.062	Andean (G1)	cream	Vine	CIAT core
125	ADP186	G1368	G1368	ADP186	Africa	CIAT core	Kenya	C	0.998	0.001	0.001	Andean (G1)	red	Vine	CIAT core	BNF efficient;Rust resistant
126	ADP188	G1375	G1375	ADP188	Africa	CIAT core	Kenya	C,T	0.001	0.999	0	Andean (G2)	yellow	Vine	CIAT core	Rust resistant
127	ADP190	G1678	G1678	ADP190	South America	CIAT core	Brazil	T,S	0	1	0	Andean (G2)	Purple speckled	Vine	CIAT core
128	ADP192	G 2377	G2377	NO	North America	CIAT core	Mexico	M	0.107	0	0.893	﻿Middle-American	tan	Vine	CIAT core	Drought
129	ADP196	G2875	G2875	ADP196	North America	CIAT core	Mexico	T	0	1	0	Andean (G2)	Cranberry	Vine	CIAT core
130	ADP199	G3452	G3452	NO	North America	CIAT core	Mexico	Sb	0	0.001	0.999	﻿Middle-American	pink	Bush	CIAT core
131	ADP205	G4494	G4494	ADP205	South America	CIAT core	Colombia	T	0.7247	0.2753	0	Andean (G1)_Admixtured	red mottled	Vine	CIAT core
132	ADP206	G4499	G4499	ADP206	North America	CIAT core	United States	T	0	1	0	Andean (G2)	white	Vine	CIAT core
133	ADP207	G4564	G4564	ADP207	South America	CIAT core	Colombia	Ca	0.9539	0.001	0.0451	Andean (G1)	j. cattle	Bush	CIAT core
134	ADP208	G4644	G4644	ADP208	South America	CIAT core	Colombia	T	0	0.9939	0.0061	Andean (G2)	red mottled	Bush	CIAT core
135	ADP211	G4780	G4780	ADP211	South America	CIAT core	Colombia	T	0	1	0	Andean (G2)	red mottled	Bush	CIAT core
136	ADP212	G4970	G4970	ADP212	South America	CIAT core	Brazil	T	0.997	0.002	0.001	Andean (G1)	tan	Bush	CIAT core
137	ADP213	G5034	G5034	ADP213	South America	CIAT core	Brazil	T	0.9837	0.0124	0.0039	Andean (G1)	grey	Vine	CIAT core
138	ADP214	G5087	G5087	ADP214	South America	CIAT core	Brazil	T	0.976	0.0041	0.0199	Andean (G1)	black	Vine	CIAT core
139	ADP220	G 5625	G5625	ADP220	North America	CIAT core	Mexico	T	0	1	0	Andean (G2)	red	Vine	CIAT core	High yield in TZ
140	ADP224	G6239	G6239	ADP224	North America	CIAT core	United States	T	0	0.986	0.014	Andean (G2)	j. cattle; tan on white	Vine	CIAT core
141	ADP225	G6415	G6415	ADP225	North America	CIAT core	United States	S	0.8192	0	0.1808	Andean (G1)	LRK	Bush	CIAT core	BNF efficient;Heat tolerant;Drought
142	ADP232	G7930	G7930	NO	South America	CIAT core	Argentina	T	0.6041	0.001	0.3949	Andean (G1)_Admixtured	white	Bush	CIAT core
143	ADP240	G 8920	G8920	ADP240	North America	CIAT core	Mexico	M	0	0	1	﻿Middle-American	yellow	Ag. Climber	CIAT core
144	ADP242	G9013	G9013	NO	North America	CIAT core	United States	T	0.999	0.001	0	Andean (G1)	Cranberry	Bush	CIAT core
145	ADP244	G9781	G9781	ADP244	North America	CIAT core	Mexico	M	0	0	1	﻿Middle-American	tan/grey spec	Ag. Climber	CIAT core
146	ADP247	G9975	G9975	ADP247	North America	CIAT core	Mexico	T	0.9978	0.0022	0	Andean (G1)	Cranberry	Climber	CIAT core	G10060;High yield in TZ
147	ADP255	G10994	G10994	ADP255	North America	CIAT core	Mexico	M	0	0	1	﻿Middle-American	tan	Ag. Climber	CIAT core	HBB resistant
148	ADP267	G12689	G12689	ADP267	South America	CIAT core	Colombia	T	0	0.965	0.035	Andean (G2)	purp cran	Bush	CIAT core
149	ADP269	G13092	G13092	ADP269	Europe	CIAT core	Turkey	T	0.9971	0.0029	0	Andean (G1)	white	Bush	CIAT core
150	ADP271	G13167	G13167	NO	Europe	CIAT core	Moldova, Republic Of	T	0	1	0	Andean (G2)	white	Bush	CIAT core
151	ADP272	G13336	G13336	ADP272	Asia	CIAT core	Japan	T	0	1	0	Andean (G2)	purp cran	Ag. Climber	CIAT core	High yield SA
152	ADP276	G 13654	G13654	NO	North America	CIAT core	Mexico	M	0.1065	0	0.8935	﻿Middle-American	tan	Vine	CIAT core	High yield in TZ;HBB resistant
153	ADP277	G13778	G13778	ADP277	Africa	CIAT core	Zambia	T	0.9969	0.0031	0	Andean (G1)	purp mottled	Bush	CIAT core	High yield in TZ
154	ADP279	G14423	G14423	ADP279	Europe	CIAT core	Spain	C,H	0	0.966	0.034	Andean (G2)	J. cattle	Ag. Climber	CIAT core
155	ADP280	G14440	G14440	ADP280	Europe	CIAT core	Spain	T	0.001	0.877	0.122	Andean (G2)	white	Vine	CIAT core
156	ADP288	G 16110A	G16110A	NO	South America	CIAT core	Peru	T	0	1	0	Andean (G2)	Red	Ag. Climber	CIAT core	High yield in TZ
157	ADP303	G17913	G17913	ADP303	Europe	CIAT core	Hungary	T	0.993	0.007	0	Andean (G1)	cream	Bush	CIAT core	Heat tolerant;Drought
158	ADP310	G18356	G18356	ADP310	South America	CIAT core	Chile	T	0.9936	0.0064	0	Andean (G1)	Cranberry	Bush	CIAT core
159	ADP324	G20729	G20729	ADP324	Africa	CIAT core	Rwanda	T	0.971	0.001	0.028	Andean (G1)	d. red	Vine	CIAT core
160	ADP337	G21303	G21303	NO	Europe	CIAT core	Bulgaria	B	0.189	0	0.811	﻿Middle-American	NA	Ag. Climber	CIAT core
161	ADP345	G22147	G22147	ADP345	South America	CIAT core	Peru	T	0	1	0	Andean (G2)	red	Bush	CIAT core
162	ADP346	G22246	G22246	ADP346	Caribean	CIAT core	Dominican Republic	T	0.903	0.0865	0.0105	Andean (G1)	red mottled	Vine	CIAT core	High yield in TZ;Rust resistant
163	ADP350	G22365	G22365	ADP350	Europe	CIAT core	Georgia	T	0	1	0	Andean (G2)	red mottled	Vine	CIAT core
164	ADP353	G22455	G22455	ADP353	Africa	CIAT core	Tanzania	T	0.001	0.999	0	Andean (G2)	grey/green	Vine	CIAT core
165	ADP354	G22502	G22502	ADP354	Africa	CIAT core	Burundi	T	0	1	0	Andean (G2)	Purple speckled	Vine	CIAT core
166	ADP366	G23070	G23070	ADP366	Africa	CIAT core	Malawi	T	0	1	0	Andean (G2)	red	Vine	CIAT core
167	ADP367	G23086	G23086	ADP367	Africa	CIAT core	Malawi	T	0.983	0	0.017	Andean (G1)	purp cran	Vine	CIAT core
168	ADP368	G23093	G23093	ADP368	Africa	CIAT core	Malawi	T	0.999	0.001	0	Andean (G1)	white pinkish	Vine	CIAT core	BNF efficient;High yield SA
169	ADP376	PI189408	PI189408	ADP376	Cent. Am	US GRIN	Guatemala	T	0.999	0.001	0	Andean (G1)	red	Bush	US core
170	ADP379	PI 203934	PI203934	NO	North America	US GRIN	Mexico	Sd	0.1116	0	0.8884	﻿Middle-American	cream	Bush	US core	HBB resistant
171	ADP383	PI209486	PI209486	ADP383	Cent. Am	US GRIN	Costa Rica	T	0.998	0.002	0	Andean (G1)	red mottled	Vine	US core
172	ADP390	PI307808	PI307808	ADP390	Cent. Am	US GRIN	El Salvador	T	0.999	0.001	0	Andean (G1)	red	Bush	US core	BNF efficient;High yield in TZ
173	ADP391	PI308894	PI308894	ADP391	Cent. Am	US GRIN	Costa Rica	T	0.9992	0.0008	0	Andean (G1)	red kidney	Bush	US core
174	ADP392	PI309701	PI309701	ADP392	North America	US GRIN	Mexico	T	0.997	0.003	0	Andean (G1)	Cranberry	Vine	US core
175	ADP395	PI310511	PI310511	ADP395	South America	US GRIN	Colombia	T	0	1	0	Andean (G2)	red mottled	Bush	US core
176	ADP413	PI 319595	PI319595	NO	North America	US GRIN	Mexico	T	0	1	0	Andean (G2)	Cranberry	Ag. Climber	US core
177	ADP417	PI451906	PI451906	ADP417	Cent. Am	US GRIN	Guatemala	.	0.999	0.001	0	Andean (G1)	red kidney	Bush	US core	Rust resistant
178	ADP428	ColoradodelPais	ColoradodelPais	ADP428	Caribean	Caribbean collection	Puerto Rico	.	0.9959	0.0031	0.001	Andean (G1)	pink cran	Bush	Carribean	HBB resistant
179	ADP429	PR9920_171	PR9920_171	ADP429	Caribean	PR breeding	Puerto Rico	.	0.9981	0.0019	0	Andean (G1)	pink cran	Bush	Carribean	Heat tolerant;IJR derived heat
180	ADP430	PR1013_3	PR1013_3	ADP430	Caribean	PR breeding	Puerto Rico	.	0.9074	0.0916	0.001	Andean (G1)	pink mottled	Bush	Carribean	CBB
181	ADP431	Gurabo5	Gurabo5	ADP431	Caribean	Caribbean collection	Puerto Rico	.	0.9984	0.001	0.0006	Andean (G1)	pink cran	Bush	Carribean
182	ADP432	PR0637_134	PR0637_134	ADP432	Caribean	PR breeding	Puerto Rico	.	0.8815	0.113	0.0055	Andean (G1)	red mottled	Bush	Carribean	HBB resistant
183	ADP433	PR9745_232	PR9745_232	ADP433	Caribean	PR breeding	Puerto Rico	.	0.185	0	0.815	﻿Middle-American	red mottled	Bush	Carribean	Heat tolerant
184	ADP434	PR0737_1	PR0737_1	ADP434	Caribean	PR breeding	Puerto Rico	.	0.7836	0.1113	0.105	Andean (G1)	red mottled	Vine	Carribean	drought;High yield SA
185	ADP435	RM-05-07	RM-05-07	ADP435	Caribean	PR breeding	Puerto Rico	.	0	0.958	0.042	Andean (G2)	red mottled	Bush	Carribean	Disease index resistant
186	ADP436	JB-178	JB-178	ADP436	Caribean	PR breeding	Puerto Rico	.	0	0.962	0.038	Andean (G2)	red mottled	Bush	Carribean
187	ADP437	PC50	PC50	ADP437	Caribean	PR breeding	Dominican Republic	T	0.9972	0.0028	0	Andean (G1)	red mottled	Bush	Carribean
188	ADP438	46_1	46_1	ADP438	Caribean	Caribbean collection	Puerto Rico	.	0.118	0	0.882	﻿Middle-American	red mottled	Vine	Carribean	Rust resistant
189	ADP439	754-3	754-3	ADP439	Caribean	Caribbean collection	Puerto Rico	.	0	0	1	﻿Middle-American	red mottled	Vine	Carribean	ALS resistant;Disease index resistant
190	ADP442	Larga Comercial	LargaComercial	ADP442	Caribean	Caribbean collection	Puerto Rico	.	0.001	0.998	0.001	Andean (G2)	red mottled	Vine	Carribean	Disease index resistant
191	ADP447	INIAP 414	INIAP414	NO	South America	INIAP	Ecuador	.	0	1	0	Andean (G2)	red mottled	Bush	Ecuador
192	ADP449	INIAP 420	INIAP420	NO	South America	INIAP	Ecuador	.	0	1	0	Andean (G2)	yellow	Bush	Ecuador
193	ADP450	INIAP422	INIAP422	ADP450	South America	Ecuador breeding	Ecuador	.	0.0008	0.8573	0.1419	Andean (G2)	white	Bush	Ecuador
194	ADP454	INIAP429	INIAP429	ADP454	South America	Ecuador breeding	Ecuador	.	0.6848	0.3152	0	Andean (G1)_Admixtured	red mottled	Ag. Climber	Ecuador	HBB resistant;Disease index resistant
195	ADP455	INIAP430	INIAP430	ADP455	South America	Ecuador breeding	Ecuador	.	0	1	0	Andean (G2)	red mottled	Bush	Ecuador
196	ADP456	INIAP480	INIAP480	NO	South America	INIAP	Ecuador	.	0	0.8259	0.1741	Andean (G2)	NA	Vine	Ecuador	BNF efficient
197	ADP457	INIAP481	INIAP481	ADP457	South America	Ecuador breeding	Ecuador	.	0.7597	0.2002	0.0401	Andean (G1)	red mottled	Ag. Climber	Ecuador	Rust resistant;Disease index resistant
198	ADP458	INIAP 483	INIAP483	ADP458	South America	Ecuador breeding	Ecuador	.	0	1	0	Andean (G2)	red mottled	Bush	Ecuador	Rust resistant;ALS resistant;Disease index resistant
199	ADP459	PI331356-C	PI331356	ADP459	Africa	US GRIN	Uganda	T	0	1	0	Andean (G2)	Cranberry	Bush	East Africa
200	ADP460	PI331356B	PI331356	ADP460	Africa	US GRIN	Uganda	T	0.999	0.001	0	Andean (G1)	Purple mottled	Bush	East Africa
201	ADP461	PI527540-A	PI527540	ADP461	Africa	US GRIN	Burundi	.	0	0	1	﻿Middle-American	beige/black mottled	Ag. Climber	East Africa	HBB resistant;Rust resistant;ALS resistant;Disease index resistant
202	ADP462	IZ 117	IZ117	NO	Africa	.	.	.	0	0	1	﻿Middle-American	dull yellow	Ag. Climber	East Africa	Rust resistant;ALS resistant;Disease index resistant
203	ADP463	PI353534-A	PI353534	ADP463	Asia	US GRIN	India	T	0	1	0	Andean (G2)	Drk. Red kidney	Bush	East Africa
204	ADP464	G39308	G39308	NO	Africa	.	.	.	0	0.953	0.047	Andean (G2)	Purple	Bush	East Africa
205	ADP465	PI321094D	PI321094	ADP465	Africa	US GRIN	Kenya	T	0.153	0	0.847	﻿Middle-American	cream	Vine	East Africa
206	ADP466	PI449430	PI449430	ADP466	Africa	US GRIN	Kenya	.	0	1	0	Andean (G2)	Purple speckled	Bush	East Africa
207	ADP467	PI209808	PI209808	ADP467	Africa	US GRIN	Kenya	T	0.999	0.001	0	Andean (G1)	Purple speckled	Vine	East Africa
208	ADP468	PI527538	PI527538	ADP468	Africa	US GRIN	Burundi	.	0.999	0.001	0	Andean (G1)	yellow	Bush	East Africa	Rust resistant
209	ADP469	PI527521	PI527521	ADP469	Africa	US GRIN	Burundi	.	0	0.999	0.001	Andean (G2)	white	Bush	East Africa
210	ADP470	PI527508	PI527508	ADP470	Africa	US GRIN	Burundi	.	0.999	0.001	0	Andean (G1)	Cranberry	Bush	East Africa	Heat tolerant
211	ADP471	IZ 102	IZ102	NO	Africa	.	.	.	0	0	1	﻿Middle-American	yellow/ brown	Vine	East Africa
212	ADP472	IZ 102	IZ102	NO	Africa	.	.	.	0	0	1	﻿Middle-American	beige	Vine	East Africa	Rust resistant;ALS resistant
213	ADP473	PI527537-F	PI527537	ADP473	Africa	US GRIN	Burundi	.	0	0	1	﻿Middle-American	gray	Vine	East Africa	ALS resistant;Disease index resistant
214	ADP474	PI527519	PI527519	ADP474	Africa	US GRIN	Burundi	.	0.966	0.001	0.033	Andean (G1)	purple mottled	Vine	East Africa
215	ADP475	PI319706	PI319706	ADP475	Africa	US GRIN	Zambia	T	0.9932	0.0068	0	Andean (G1)	yellow	Vine	East Africa	Heat tolerant
216	ADP476	Hutterite	Hutterite	ADP476	Europe	US GRIN	.	.	0	0.754	0.246	Andean (G2)	yellow	Vine	East Africa
217	ADP477	PI527512	PI527512	ADP477	Africa	US GRIN	Burundi	.	0.9972	0.002	0.0008	Andean (G1)	Purple speckled	Bush	East Africa	BNF efficient
218	ADP478	PI353536	PI353536	ADP478	Africa	US GRIN	Kenya	T	0.999	0.001	0	Andean (G1)	green	Bush	East Africa	Heat tolerant
219	ADP479	PI527530	PI527530	ADP479	Africa	US GRIN	Burundi	.	0	0.876	0.124	Andean (G2)	yellow/ brown	Vine	East Africa
220	ADP480	PI209804	PI209804	ADP480	Africa	US GRIN	Kenya	T	0	1	0	Andean (G2)	Purple mottled	Bush	East Africa
221	ADP481	PI449428	PI449428	ADP481	Africa	US GRIN	Kenya	.	0.6971	0.3029	0	Andean (G1)_Admixtured	red/white mottled	Bush	East Africa	High yield SA
222	ADP482	PI209802	PI209802	ADP482	Africa	US GRIN	Kenya	T	0	1	0	Andean (G2)	Purple mottled	Bush	East Africa
223	ADP483	PI209815	PI209815	ADP483	Africa	US GRIN	Kenya	T	0.999	0.001	0	Andean (G1)	yellow	Vine	East Africa
224	ADP508	Calembe	Calembe	ADP508	Africa	Angola collection	Angola	.	0.971	0.001	0.028	Andean (G1)	manteca	Vine	Angola	HBB resistant;Rust resistant;Disease index resistant
225	ADP509	Fernando	Fernando	ADP509	Africa	Angola collection	Angola	.	0.99	0.009	0.001	Andean (G1)	Yellow striped?	Bush	Angola
226	ADP510	Ohliodeperdiz	Ohliodeperdiz	ADP510	Africa	Angola collection	Angola	.	0.9535	0.001	0.0455	Andean (G1)	Jacobs Cattle	Vine	Angola
227	ADP511	Canario	Canario	ADP511	Africa	Angola collection	Angola	.	0.9391	0.0009	0.06	Andean (G1)	yellow	Vine	Angola
228	ADP512	Ervilha	Ervilha	ADP512	Africa	Angola collection	Angola	.	0.0141	0.9859	0	Andean (G2)	manteca	Vine	Angola
229	ADP513	Canario	Canario	ADP513	Africa	Angola collection	Angola	.	0.9292	0.001	0.0698	Andean (G1)	yellow	Vine	Angola
230	ADP514	MantegaAmarela	MantegaAmarela	ADP514	Africa	Angola collection	Angola	.	0.9507	0.0013	0.048	Andean (G1)	manteca	Vine	Angola	BNF efficient
231	ADP515	KatarinaKibala	KatarinaKibala	ADP515	Africa	Angola collection	Angola	.	0.999	0.001	0	Andean (G1)	Cranberry	Bush	Angola
232	ADP516	Mantega, kibala	Mantega,kibala	NO	Africa	.	Angola	.	0	0.9472	0.0528	Andean (G2)	manteca	Vine	Angola	drought
233	ADP518	MantegablancaKibala	MantegablancaKibala	ADP518	Africa	Angola collection	Angola	.	0.9681	0.0019	0.03	Andean (G1)	manteca	Bush	Angola
234	ADP519	KatarinaCela	KatarinaCela	ADP519	Africa	Angola collection	Angola	.	0.892	0.108	0	Andean (G1)	Cranberry	Bush	Angola	High yield in TZ
235	ADP520	Chumbo,Cela	Chumbo,Cela	ADP520	Africa	Angola collection	Angola	.	0.001	0.999	0	Andean (G2)	green	Vine	Angola
236	ADP521	Cebo,Cela	Cebo,Cela	ADP521	Africa	Angola collection	Angola	.	0.001	0.998	0.001	Andean (G2)	manteca	Bush	Angola
237	ADP522	Amarelo,Cela	Amarelo,Cela	ADP522	Africa	Angola collection	Angola	.	0	0.0689	0.9311	﻿Middle-American	d. yellow	Vine	Angola	HBB resistant
238	ADP523	CanarioCela	CanarioCela	ADP523	Africa	Angola collection	Angola	.	0.94	0.001	0.059	Andean (G1)	yellow	Vine	Angola	drought
239	ADP524	KATB1	KATB1	ADP524	Africa	CIAT Africa	kenya	.	0.001	0.999	0	Andean (G2)	green yellow	Bush	CIAT Africa
240	ADP525	KATB9	KATB9	ADP525	Africa	CIAT Africa	kenya	.	0.001	0.999	0	Andean (G2)	red	Bush	CIAT Africa	High yield SA
241	ADP526	CAL 143	CAL143	ADP526	Africa	CIAT Africa	Malawi	.	0.7267	0.2733	0	Andean (G1)_Admixtured	red mottled	Bush	CIAT Africa	HBB resistant;Rust resistant;ALS resistant;Disease index resistant;High yield SA
242	ADP527	POA2	POA2	ADP527	Africa	CIAT Africa	Uganda	.	0	1	0	Andean (G2)	red mottled	Bush	CIAT Africa	Disease index resistant;High yield SA
243	ADP528	LYAMUNGO85	LYAMUNGO85	ADP528	Africa	CIAT Africa	Kenya	.	0	1	0	Andean (G2)	red mottled	Bush	CIAT Africa
244	ADP529	LYAMUNGO90	LYAMUNGO90	ADP529	Africa	CIAT Africa	Tanzania	.	0	1	0	Andean (G2)	d red mottled	Bush	CIAT Africa
245	ADP530	SELIAN94	SELIAN94	ADP530	Africa	CIAT Africa	Tanzania	.	0	1	0	Andean (G2)	pink mottled	Vine	CIAT Africa
246	ADP531	AND620	AND620	ADP531	South America	CIAT Africa	Colombia	.	0	1	0	Andean (G2)	d red mottled	Bush	CIAT Africa
247	ADP532	A 197	A197	ADP532	South America	CIAT Africa	Colombia	.	0	0.9935	0.0065	Andean (G2)	light tan	Bush	CIAT Africa
248	ADP534	G22501	G22501	ADP534	Africa	CIAT Africa	Burundi	T	0	1	0	Andean (G2)	lt tan grey	Bush	CIAT Africa	Rust resistant;drought
249	ADP535	ARA4	ARA4	ADP535	Africa	CIAT Africa	.	.	0	1	0	Andean (G2)	red mottled	Bush	CIAT Africa
250	ADP537	AFR 619	AFR619	ADP537	South America	CIAT Africa	Colombia	.	0.0009	0.9281	0.071	Andean (G2)	red mottled	Bush	CIAT Africa	HBB resistant;Disease index resistant
251	ADP538	RWR 221	RWR221	ADP538	Africa	CIAT Africa	Rwanda	.	0	1	0	Andean (G2)	LRK	Bush	CIAT Africa
252	ADP539	RWR1946	RWR1946	ADP539	Africa	CIAT Africa	Rwanda	.	0	1	0	Andean (G2)	NA	NA	CIAT Africa
253	ADP540	AFR 708	AFR708	ADP540	South America	CIAT Africa	Colombia	.	0	1	0	Andean (G2)	red mottled	Bush	CIAT Africa	ALS resistant
254	ADP541	CIM 9314-36	CIM9314-36	ADP541	Africa	CIAT Africa	.	.	0	0.92	0.08	Andean (G2)	NA	Bush	CIAT Africa	Rust resistant;Disease index resistant;High yield Roza
255	ADP543	G16157	G16157	ADP543	Europe	CIAT Africa	Hungary	T	0	1	0	Andean (G2)	LRK	Bush	CIAT Africa
256	ADP544	PVA773	PVA773	ADP544	Africa	CIAT Africa	Mozambique	.	0	1	0	Andean (G2)	red mottled	Bush	CIAT Africa
257	ADP545	PAN127	PAN127	ADP545	Africa	CIAT Africa	.	.	0	0.913	0.087	Andean (G2)	Cranberry	Vine	CIAT Africa
258	ADP546	Red Canadian Wonder	RedCanadianWonder	ADP546	Africa	CIAT Africa	.	.	0.002	0.946	0.052	Andean (G2)	dark red-pur	Vine	CIAT Africa	High yield Roza
259	ADP550	Ranjonomby	Ranjonomby	NO	Africa	CIAT Africa	.	.	0	0.821	0.179	Andean (G2)	NA	Bush	CIAT Africa
260	ADP551	AFR 612	AFR612	ADP551	South America	CIAT Africa	Colombia	.	0.001	0.999	0	Andean (G2)	d. red mottled	Bush	CIAT Africa	ALS resistant;Disease index resistant
261	ADP553	AND 277	AND277	ADP553	South America	CIAT Africa	Colombia	.	0	1	0	Andean (G2)	red mottled	Bush	CIAT Africa	ALS resistant
262	ADP554	AND 279	AND279	ADP554	South America	CIAT Africa	Colombia	.	0	1	0	Andean (G2)	red mottled	Bush	CIAT Africa
263	ADP555	BRB191	BRB191	ADP555	South America	CIAT Africa	Colombia	.	0	0.999	0.001	Andean (G2)	red mottled	Bush	CIAT Africa	Disease index resistant
264	ADP556	BRB 194	BRB194	ADP556	South America	CIAT Africa	Colombia	.	0	1	0	Andean (G2)	d. red	Bush	CIAT Africa	ALS resistant;High yield Roza
265	ADP557	COS16	COS16	ADP557	South America	CIAT Africa	Colombia	.	0.0025	0.9975	0	Andean (G2)	Cranberry	Bush	CIAT Africa	High yield Roza
266	ADP558	DAB528	DAB528	ADP558	South America	CIAT Africa	Colombia	.	0	0.9848	0.0152	Andean (G2)	red	Bush	CIAT Africa
267	ADP559	DAB555	DAB555	ADP559	South America	CIAT Africa	Colombia	.	0	0.9616	0.0384	Andean (G2)	NA	Bush	CIAT Africa
268	ADP560	DAB230	DAB230	ADP560	South America	CIAT Africa	Colombia	.	0	1	0	Andean (G2)	red mottled	Bush	CIAT Africa
269	ADP561	DAB246	DAB246	ADP561	South America	CIAT Africa	Colombia	.	0	1	0	Andean (G2)	red mottled	Bush	CIAT Africa
270	ADP562	DAB387	DAB387	ADP562	South America	CIAT Africa	Colombia	.	0.0234	0.9766	0	Andean (G2)	Cranberry	Bush	CIAT Africa
271	ADP564	G5164	G5164	ADP564	South America	CIAT Africa	Brazil	T	0	1	0	Andean (G2)	pink mottled	Vine	CIAT Africa
272	ADP566	G 5686	G5686	ADP566	South America	CIAT Africa	Ecuador	H	0.001	0.8665	0.1325	Andean (G2)	yellow mottled	Vine	CIAT Africa	HBB resistant;Disease index resistant
273	ADP567	G 4523	G4523	ADP567	South America	CIAT Africa	Colombia	T	0.0003	0.9987	0.001	Andean (G2)	d. red mottled	Bush	CIAT Africa	Rust resistant
274	ADP568	KABOON	KABOON	ADP568	Europe	CIAT Africa	Netherlands	.	0.006	0.994	0	Andean (G2)	NA	NA	CIAT Africa
275	ADP569	MDRK	MDRK	ADP569	North America	CIAT Africa	United States	.	0.001	0.999	0	Andean (G2)	dark red	Bush	CIAT Africa
276	ADP570	NATALSUGAR	NATALSUGAR	ADP570	Africa	CIAT Africa	South Africa	.	0.0054	0.9268	0.0678	Andean (G2)	Cranberry	Vine	CIAT Africa
277	ADP571	NUA45	NUA45	ADP571	South America	CIAT Africa	Colombia	.	0	0.8646	0.1354	Andean (G2)	d red mottled	Bush	CIAT Africa
278	ADP572	NUA56	NUA56	ADP572	South America	CIAT Africa	Colombia	.	0	0.863	0.137	Andean (G2)	d red mottled	Vine	CIAT Africa	HBB resistant;Disease index resistant
279	ADP573	PERRYMARROW	PERRYMARROW	ADP573	North America	CIAT Africa	United States	.	0	1	0	Andean (G2)	NA	NA	CIAT Africa
280	ADP574	RADICAL CERINZA	RADICALCERINZA	ADP574	South America	CIAT Africa	.	.	0.672	0.327	0.001	Andean (G1)_Admixtured	NA	Bush	CIAT Africa	Disease index resistant
281	ADP575	SAB259	SAB259	ADP575	South America	CIAT Africa	Colombia	.	0.0063	0.7599	0.2338	Andean (G2)	Cranberry	Bush	CIAT Africa
282	ADP576	SAB618	SAB618	ADP576	South America	CIAT Africa	Colombia	.	0	1	0	Andean (G2)	Red mottled	Bush	CIAT Africa
283	ADP578	SAB622	SAB622	ADP578	South America	CIAT Africa	Colombia	.	0	0.93	0.07	Andean (G2)	NA	Bush	CIAT Africa
284	ADP579	SAB623	SAB623	ADP579	South America	CIAT Africa	Colombia	.	0	0.936	0.064	Andean (G2)	NA	Bush	CIAT Africa
285	ADP580	SAB626	SAB626	ADP580	South America	CIAT Africa	Colombia	.	0.0013	0.9987	0	Andean (G2)	Cranberry	Bush	CIAT Africa
286	ADP581	SAB629	SAB629	ADP581	South America	CIAT Africa	Colombia	.	0	1	0	Andean (G2)	Cranberry	Bush	CIAT Africa
287	ADP582	SAB630	SAB630	ADP582	South America	CIAT Africa	Colombia	.	0	1	0	Andean (G2)	Cranberry	Bush	CIAT Africa
288	ADP583	SAB650	SAB650	ADP583	South America	CIAT Africa	Colombia	.	0	0.806	0.194	Andean (G2)	red mottled	Bush	CIAT Africa
289	ADP584	SAB659	SAB659	ADP584	South America	CIAT Africa	Colombia	.	0.638	0.361	0.001	Andean (G1)_Admixtured	red mottled	Bush	CIAT Africa	High yield SA
290	ADP585	SAB686	SAB686	ADP585	South America	CIAT Africa	Colombia	.	0	1	0	Andean (G2)	Cranberry	Bush	CIAT Africa
291	ADP586	SAB691	SAB691	ADP586	South America	CIAT Africa	Colombia	.	0	1	0	Andean (G2)	Cranberry	Bush	CIAT Africa
292	ADP587	SAB712	SAB712	ADP587	South America	CIAT Africa	Colombia	.	0	0.8736	0.1264	Andean (G2)	white	Bush	CIAT Africa
293	ADP588	SAP 1	SAP1	ADP588	South America	CIAT Africa	Colombia	.	0	0.8743	0.1257	Andean (G2)	d. red mottled	Bush	CIAT Africa	High yield SA
294	ADP589	SEQ1003	SEQ1003	ADP589	South America	CIAT Africa	Colombia	.	0.001	0.997	0.002	Andean (G2)	pink mottled	Vine	CIAT Africa
295	ADP590	SEQ11	SEQ11	ADP590	South America	CIAT Africa	Colombia	.	0	0	1	﻿Middle-American	d. purple mottled	Vine	CIAT Africa	Rust resistant;ALS resistant;Disease index resistant;drought;High yield SA;High yield Roza
296	ADP591	VELAZCO LARGO	VELAZCOLARGO	ADP591	Caribean	CIAT Africa	Cuba	.	0.001	0.999	0	Andean (G2)	LRK	Bush	CIAT Africa	Disease index resistant
297	ADP592	AND 1005	AND1005	ADP592	South America	CIAT Africa	Colombia	.	0	1	0	Andean (G2)	red mottled	Vine	CIAT Africa	HBB resistant
298	ADP595	G13094	G13094	ADP595	North America	CIAT Africa	Mexico	T	0	1	0	Andean (G2)	yellow	Bush	CIAT Africa
299	ADP597	G23829	G23829	ADP597	South America	CIAT Africa	Peru	T	0	0.194	0.806	﻿Middle-American	black	Vine	CIAT Africa	ALS resistant;Disease index resistant;High yield Roza
300	ADP598	Charlevoix	Charlevoix	ADP598	North America	BeanCAP	United States	.	0.9994	0.0006	0	Andean (G1)	Drk. Red kidney	Bush	N American	Heat tolerant
301	ADP599	Isles	Isles	ADP599	North America	BeanCAP	United States	.	0.001	0.905	0.094	Andean (G2)	red	Bush	N American	Heat tolerant
302	ADP600	K07921	K07921	ADP600	North America	BeanCAP	United States	.	0.999	0.001	0	Andean (G1)	white kidney	Bush	N American	Heat tolerant
303	ADP601	Camelot	Camelot	ADP601	North America	BeanCAP	United States	.	0.7766	0.001	0.2224	Andean (G1)	red	Bush	N American
304	ADP602	Sacramento	Sacramento	ADP602	North America	BeanCAP	United States	.	0.999	0.001	0	Andean (G1)	LRK	Bush	N American	Heat tolerant
305	ADP603	Wallace773_V98	Wallace773_V98	ADP603	North America	BeanCAP	United States	.	0.8799	0	0.1201	Andean (G1)	LRK	Bush	N American	drought;Rust resistant
306	ADP604	1062_V98	1062_V98	ADP604	North America	BeanCAP	United States	.	0.981	0.001	0.018	Andean (G1)	LRK	Bush	N American
307	ADP605	1132_V96	1132_V96	ADP605	North America	BeanCAP	United States	.	0.8959	0.0001	0.104	Andean (G1)	LRK	Bush	N American	Heat tolerant
308	ADP606	NY104	NY104	ADP606	North America	BeanCAP	United States	.	0	0.9914	0.0086	Andean (G2)	LRK	Bush	N American	Heat tolerant
309	ADP607	NY105	NY105	ADP607	North America	BeanCAP	United States	.	0.98	0.001	0.019	Andean (G1)	LRK	Bush	N American	Heat tolerant
310	ADP608	UI_51	UI_51	ADP608	North America	BeanCAP	United States	.	0.9452	0.0019	0.0529	Andean (G1)	Cranberry	Bush	N American	Heat tolerant
311	ADP609	K-407	K-407	ADP609	North America	BeanCAP	United States	.	0.001	0.999	0	Andean (G2)	Drk. Red kidney	Bush	N American	drought
312	ADP610	G122	G122	ADP610	Asia	BeanCAP	India	T	0.9967	0.0023	0.001	Andean (G1)	Cranberry	Bush	N American	Heat tolerant
313	ADP611	PompadourB	PompadourB	ADP611	Caribean	BeanCAP	Dominican Republic	.	0.9851	0.0139	0.001	Andean (G1)	red mottled	Bush	N American	High yield in TZ
314	ADP612	ICAQuimbaya	ICAQuimbaya	ADP612	South America	BeanCAP	Colombia	T	0.8122	0.1878	0	Andean (G1)	red mottled	Bush	N American	High yield in TZ
315	ADP613	02_385_14	02_385_14	ADP613	North America	BeanCAP	United States	.	0.8894	0	0.1106	Andean (G1)	LRK	Bush	N American
316	ADP614	ND061106	ND061106	ADP614	North America	BeanCAP	United States	.	0.984	0.001	0.015	Andean (G1)	LRK	Bush	N American	Heat tolerant
317	ADP615	Litekid	Litekid	ADP615	North America	Canada breeding	Canada	.	0.8734	0.0005	0.1261	Andean (G1)	LRK	Bush	N American
318	ADP616	OAC_Lyrick	OAC_Lyrick	ADP616	North America	Canada breeding	Canada	.	0.999	0.001	0	Andean (G1)	LRK	Bush	N American
319	ADP617	RedRider	RedRider	ADP617	North America	Canada breeding	Canada	.	0.982	0.018	0	Andean (G1)	Cranberry	Bush	N American
320	ADP618	AC_Elk	AC_Elk	ADP618	North America	Canada breeding	Canada	.	0.9807	0.0003	0.019	Andean (G1)	LRK	Bush	N American
321	ADP619	UCD0906	UCD0906	ADP619	North America	BeanCAP	United States	.	0.964	0.036	0	Andean (G1)	Jacobs Cattle	Bush	N American	drought
322	ADP620	UCD0405	UCD0405	ADP620	North America	BeanCAP	United States	.	0.809	0.191	0	Andean (G1)	red spec	Bush	N American	High yield in TZ;drought
323	ADP621	JaloEEP558	JaloEEP558	ADP621	South America	BeanCAP	Brazil	T	0.9717	0.0275	0.0008	Andean (G1)	Yellow	Vine	N American
324	ADP622	UCD0701	UCD0701	ADP622	North America	BeanCAP	United States	.	0.8497	0.1503	0	Andean (G1)	Jacobs cattle	Bush	N American	Heat tolerant
325	ADP623	Drake	Drake	ADP623	North America	BeanCAP	United States	.	0.9188	0.0002	0.081	Andean (G1)	Drk. Red kidney	Bush	N American
326	ADP624	Dolly	Dolly	ADP624	North America	BeanCAP	United States	.	0.999	0.001	0	Andean (G1)	Cranberry	Bush	N American	drought;High yield Roza;heat
327	ADP625	Micran	Micran	ADP625	North America	BeanCAP	United States	.	0.8828	0.1162	0.001	Andean (G1)	Cranberry	Bush	N American	drought
328	ADP626	Badillo	Badillo	ADP626	Caribean	BeanCAP	Puerto Rico	.	0.6167	0.0965	0.2868	Andean (G1)_Admixtured	LRK	Vine	N American	Heat tolerant
329	ADP627	H9659_21_1	H9659_21_1	ADP627	North America	BeanCAP	United States	.	0.999	0.001	0	Andean (G1)	LRK	Vine	N American
330	ADP628	H9659_27_7	H9659_27_7	ADP628	North America	BeanCAP	United States	.	0.9975	0.0025	0	Andean (G1)	LRK	Vine	N American	drought;High yield Roza
331	ADP629	H9659_27_10	H9659_27_10	ADP629	North America	BeanCAP	United States	.	0.9939	0.0061	0	Andean (G1)	LRK	Vine	N American	Heat tolerant;drought
332	ADP630	H9659_23_1	H9659_23_1	ADP630	North America	BeanCAP	United States	.	0.999	0.001	0	Andean (G1)	LRK	Vine	N American	drought
333	ADP631	OAC_Inferno	OAC_Inferno	ADP631	North America	Canada breeding	Canada	.	0.996	0.001	0.003	Andean (G1)	LRK	Bush	N American	Heat tolerant;High yield Roza;drought;Rust resistant
334	ADP633	TARS_HT2	TARS_HT2	ADP633	Caribean	BeanCAP	Puerto Rico	.	0.967	0.001	0.032	Andean (G1)	LRK	Bush	N American	Heat tolerant
335	ADP634	UC_RedKidney	UC_RedKidney	ADP634	North America	BeanCAP	United States	.	0.9962	0.0038	0	Andean (G1)	LRK	Bush	N American
336	ADP635	OACRedstar	OACRedstar	ADP635	North America	Canada breeding	Canada	.	0.0035	0.7925	0.204	Andean (G2)	Drk. Red kidney	Bush	N American
337	ADP636	Montcalm(S)	Montcalm(S)	ADP636	North America	BeanCAP	United States	B	0.871	0.0006	0.1284	Andean (G1)	Drk. Red kidney	Bush	N American
338	ADP637	Isabella	Isabella	ADP637	North America	BeanCAP	United States	.	0.9729	0.0009	0.0262	Andean (G1)	LRK	Bush	N American
339	ADP638	RedHawk	RedHawk	ADP638	North America	BeanCAP	United States	.	0.8763	0.0003	0.1234	Andean (G1)	Drk. Red kidney	Bush	N American
340	ADP639	Chinook2000	Chinook2000	ADP639	North America	BeanCAP	United States	.	0.915	0	0.085	Andean (G1)	LRK	Bush	N American
341	ADP640	Beluga	Beluga	ADP640	North America	BeanCAP	United States	.	0.999	0.001	0	Andean (G1)	white kidney	Bush	N American
342	ADP641	Capri	Capri	ADP641	North America	BeanCAP	United States	.	0.9775	0.001	0.0215	Andean (G1)	Cranberry	Bush	N American	High yield SA
343	ADP642	TaylorHort	TaylorHort	ADP642	North America	BeanCAP	United States	.	0.9838	0.0162	0	Andean (G1)	Cranberry	Bush	N American
344	ADP643	Cardinal	Cardinal	ADP643	North America	BeanCAP	United States	.	0.9649	0.001	0.0341	Andean (G1)	Cranberry	Bush	N American
345	ADP644	FoxFire	FoxFire	ADP644	North America	BeanCAP	United States	.	0.999	0.001	0	Andean (G1)	LRK	Bush	N American
346	ADP645	Lassen	Lassen	ADP645	North America	BeanCAP	United States	.	0.001	0.999	0	Andean (G2)	white kidney	Bush	N American
347	ADP646	Myasi	Myasi	ADP646	North America	BeanCAP	United States	.	0.9871	0.0119	0.001	Andean (G1)	Yellow	Bush	N American
348	ADP647	RedKanner	RedKanner	ADP647	North America	BeanCAP	United States	.	0.7951	0	0.2049	Andean (G1)	LRK	Bush	N American
349	ADP648	RedKloud	RedKloud	ADP648	North America	BeanCAP	United States	T	0.909	0.003	0.088	Andean (G1)	LRK	Bush	N American	High yield in TZ
350	ADP649	Kamiakin	Kamiakin	ADP649	North America	BeanCAP	United States	.	0.9902	0.001	0.0088	Andean (G1)	LRK	Bush	N American	High yield SA
351	ADP650	K42	K42	ADP650	North America	BeanCAP	United States	.	0.999	0.001	0	Andean (G1)	LRK	Bush	N American	High yield Roza
352	ADP651	K59	K59	ADP651	North America	BeanCAP	United States	.	0.948	0.001	0.051	Andean (G1)	LRK	Bush	N American	High yield in TZ
353	ADP652	Lisa	Lisa	ADP652	North America	BeanCAP	United States	.	0.999	0.001	0	Andean (G1)	white kidney	Bush	N American
354	ADP653	USDK_CBB_15	USDK_CBB_15	ADP653	North America	BeanCAP	United States	.	0.8741	0	0.1259	Andean (G1)	Drk. Red kidney	Bush	N American	High yield in TZ
355	ADP654	USDK4	USDK4	ADP654	North America	BeanCAP	United States	.	0.8696	0.001	0.1294	Andean (G1)	Drk. Red kidney	Bush	N American
356	ADP655	Fiero	Fiero	ADP655	North America	BeanCAP	United States	.	0.8552	0.0001	0.1447	Andean (G1)	Drk. Red kidney	Bush	N American
357	ADP656	RoyalRed	RoyalRed	ADP656	North America	BeanCAP	United States	.	0.998	0.002	0	Andean (G1)	Drk. Red kidney	Bush	N American	High yield in TZ
358	ADP657	Kardinal	Kardinal	ADP657	North America	BeanCAP	United States	.	0.999	0.001	0	Andean (G1)	LRK	bush	N American	drought
359	ADP658	Blush	Blush	ADP658	North America	BeanCAP	United States	.	0.9901	0.001	0.0089	Andean (G1)	LRK	Bush	N American
360	ADP659	USLK1	USLK1	ADP659	North America	BeanCAP	United States	.	0.9995	0.0005	0	Andean (G1)	LRK	Bush	N American	High yield in TZ
361	ADP660	Krimson	Krimson	ADP660	North America	BeanCAP	United States	.	0.9639	0.0011	0.035	Andean (G1)	Cranberry	Bush	N American	Drought
362	ADP661	USCR7	USCR7	ADP661	North America	BeanCAP	United States	.	0.925	0.001	0.074	Andean (G1)	Cranberry	Bush	N American
363	ADP662	USCR9	USCR9	ADP662	North America	BeanCAP	United States	.	0.953	0.007	0.04	Andean (G1)	Cranberry	Bush	N American
364	ADP663	USCR_CBB_20	USCR_CBB_20	ADP663	North America	BeanCAP	United States	.	0.9542	0.0008	0.045	Andean (G1)	Cranberry	Bush	N American
365	ADP664	SilverCloud	SilverCloud	ADP664	North America	BeanCAP	United States	.	0.981	0	0.019	Andean (G1)	white kidney	Bush	N American	High yield in TZ
366	ADP665	USWK_CBB17	USWK_CBB17	ADP665	North America	BeanCAP	United States	.	0.959	0	0.041	Andean (G1)	white kidney	Bush	N American
367	ADP666	USWK6	USWK6	ADP666	North America	BeanCAP	United States	.	0.998	0.002	0	Andean (G1)	white kidney	Bush	N American	High yield in TZ
368	ADP667	VA-19	VA-19	ADP667	North America	BeanCAP	United States	.	0.0135	0.9855	0.001	Andean (G2)	LRK	Bush	N American	High yield in TZ;drought
369	ADP668	Cran-09	Cran-09	ADP668	North America	BeanCAP	United States	.	0	1	0	Andean (G2)	Cranberry	Bush	N American
370	ADP670	AC_Calmont	AC_Calmont	ADP670	North America	Canada breeding	Canada	.	0.9115	0.001	0.0875	Andean (G1)	Drk. Red kidney	Bush	N American
371	ADP672	CDRK	CDRK	ADP672	North America	BeanCAP	United States	T	0.999	0.001	0	Andean (G1)	Drk. Red kidney	Bush	N American
372	ADP673	UC_Nichols	UC_Nichols	ADP673	North America	BeanCAP	United States	.	0.797	0.202	0.001	Andean (G1)	Drk. Red kidney	Bush	N American
373	ADP674	UCD0704	UCD0704	ADP674	North America	BeanCAP	United States	.	0.868	0.001	0.131	Andean (G1)	white kidney	Bush	N American
374	ADP675	UCD0801	UCD0801	ADP675	North America	BeanCAP	United States	.	0.9865	0.0135	0	Andean (G1)	Cranberry	Bush	N American
375	ADP676	CELRK	CELRK	ADP676	North America	BeanCAP	United States	.	0.999	0.001	0	Andean (G1)	Drk. Red kidney	Bush	N American
376	ADP677	Etna	Etna	ADP677	North America	BeanCAP	United States	.	0.996	0.004	0	Andean (G1)	Cranberry	Bush	N American
377	ADP678	Hooter	Hooter	ADP678	North America	BeanCAP	United States	.	0.999	0.001	0	Andean (G1)	Cranberry	Bush	N American	High yield SA
378	ADP679	RedRover	RedRover	ADP679	North America	BeanCAP	United States	.	0.9168	0.0002	0.083	Andean (G1)	Drk. Red kidney	Bush	N American
379	ADP680	Clouseau	Clouseau	ADP680	North America	BeanCAP	United States	.	0.9866	0.0044	0.009	Andean (G1)	LRK	Bush	N American
380	ADP681	Bellagio	Bellagio	ADP681	North America	BeanCAP	United States	.	0	0.911	0.089	Andean (G2)	Cranberry	Vine	N American	High yield SA
381	ADP682	UI-686	UI-686	ADP682	North America	BeanCAP	United States	.	0	0.9362	0.0638	Andean (G2)	Cranberry	Vine	N American
382	ADP683	IJR	IJR	ADP683	Asia	BeanCAP	India	.	0.001	0.999	0	Andean (G2)	pink mottled	Vine	N American	Heat tolerant;High yield SA
383	ADP684	Majesty	Majesty	ADP684	North America	Canada breeding	Canada	.	0.0025	0.9424	0.0551	Andean (G2)	Drk. Red kidney	Vine	N American	High yield in TZ;drought
384	ADP685	Chianti	Chianti	NO	North America	.	.	.	0	0.993	0.007	Andean (G2)	Cranberry	Vine	N American	drought
385	ADP686	UCD 707	UCD707	NO	North America	.	.	.	0	1	0	Andean (G2)	Yellow	Bush	N American
386	ADP687	Pink Panther	PinkPanther	ADP687	North America	BeanCAP	United States	.	0.001	0.9962	0.0028	Andean (G2)	LRK	Bush	N American	High yield in TZ;drought
387	ADP701	Bola 60 Dias	Bola60Dias(TypeIlandrace)	NO	Europe	.	.	.	0	0.818	0.182	Andean (G2)	Brown	NA	Misc
388	ADP702	Blanco Español	BlancoEspañol(TypeIII,landrace)	NO	Europe	.	.	.	0	0.9279	0.0721	Andean (G2)	White	NA	Misc
389	ADP703	Canario 107	Canario107(TypeIlandrace)	NO	Europe	.	.	.	0	1	0	Andean (G2)	Yellow	NA	Misc
390	ADP704	Canela	Canela(TypeIlandrace)	NO	Europe	.	.	.	0.001	0.8816	0.1174	Andean (G2)	Yellow	NA	Misc
391	ADP705	Cerrillos	Cerrillos(TypeIlandrace)	NO	Europe	.	.	.	0	0.5036	0.4964	Andean (G2)_Admixtured	white	NA	Misc
392	ADP707	G 5686	G5686(TypeIlandrace)	NO	North America	.	United States	H	0	0.8669	0.1331	Andean (G2)	brown speckled	NA	Misc
393	ADP708	Gordo	Gordo(TypeIlandrace)	NO	Europe	.	.	.	0	1	0	Andean (G2)	brown	NA	Misc
394	ADP710	Dore de Kirundo	DoredeKirundo(TypeIIIlandrace)	NO	Europe	.	.	.	0	0.9957	0.0043	Andean (G2)	brown	NA	Misc
395	ADP711	Lingua de Fuego	LinguadeFuego(TypeIlandrace)	NO	Europe	.	.	.	0	1	0	Andean (G2)	Cranberry	NA	Misc
396	ADP715	Xana	Xana(TypeIbredcultivar,aconvertedTypeIVlandrace)	NO	Europe	Spain	.	.	0	0.7127	0.2873	Andean (G2)_Admixtured	very large	NA	Misc
397	ADP716	MW-1	MW-1	NO	Africa	.	.	.	0	0.999	0.001	Andean (G2)	Cranberry	Vine	East Africa	HBB resistant;AFV-15;110_AF-15;ALS resistant;Disease index resistant
398	ADP717	MW-2	MW-2	NO	Africa	.	.	.	0	1	0	Andean (G2)	Cranberry	Vine	East Africa
399	ADP718	MW-3	MW-3	NO	Africa	.	.	.	0	1	0	Andean (G2)	RD MOTT	Bush	East Africa	CL-48
400	ADP719	MW-4	MW-4	NO	Africa	.	.	.	0	0.947	0.053	Andean (G2)	PUR MOTT	Vine	East Africa	Rust resistant
401	ADP720	MW-5	MW-5	NO	Africa	.	.	.	0	0.8936	0.1064	Andean (G2)	Cranberry	Vine	East Africa	High yield Roza
402	ADP722	MW-7	MW-7	NO	Africa	.	.	.	0	0.4959	0.5041	Andean (G1)_Admixtured	Cranberry	Vine	East Africa	ALS resistant;Disease index resistant
403	ADP723	KAB06F2.8-69	KAB06F2.8-69	NO	Africa	.	.	.	0	0.5755	0.4245	Andean (G2)_Admixtured	Cranberry	Vine	East Africa	HBB resistant;Disease index resistant
404	ADP724	MW-9	MW-9	NO	Africa	.	.	.	0	0.9139	0.0861	Andean (G2)	Drk. Red kidney	Vine	East Africa	Rust resistant;ALS resistant;Disease index resistant;High yield SA;High yield Roza
405	ADP726	MW-11	MW-11	NO	Africa	.	.	.	0	0.878	0.122	Andean (G2)	Cranberry	Vine	East Africa	High yield SA;High yield Roza
406	ADP727	MW-12	MW-12	NO	Africa	.	.	.	0	0.9646	0.0354	Andean (G2)	TAN	Bush	East Africa	Rust resistant;High yield Roza
407	ADP728	MW-13	MW-13	NO	Africa	.	.	.	0	0.8637	0.1363	Andean (G2)	LRK	Vine	East Africa	HBB resistant;Rust resistant;ALS resistant;Disease index resistant
408	ADP730	MW-15	MW-15	NO	Africa	.	.	.	0	0.965	0.035	Andean (G2)	PUR MOTT	Vine	East Africa	HBB resistant
409	ADP731	MW-16	MW-16	NO	Africa	.	.	.	0	1	0	Andean (G2)	RD MOTT	Bush	East Africa	HBB resistant;Rust resistant;ALS resistant;Disease index resistant
410	ADP732	MW-17	MW-17	NO	Africa	.	.	.	0.001	0.999	0	Andean (G2)	RD MOTT	Bush	East Africa	HBB resistant;Rust resistant;ALS resistant;Disease index resistant
411	ADP733	MW-18	MW-18	NO	Africa	.	.	.	0	0.9171	0.0829	Andean (G2)	RD MOTT	NA	East Africa
412	ADP734	MW-19	MW-19	NO	Africa	.	.	.	0.0006	0.9994	0	Andean (G2)	RD MOTT	Bush	East Africa	HBB resistant;ALS resistant;Disease index resistant
413	ADP735	MW-20	MW-20	NO	Africa	.	.	.	0	1	0	Andean (G2)	RD MOTT	Vine	East Africa	High yield Roza
414	ADP737	MW-22	MW-22	NO	Africa	.	.	.	0	0.906	0.094	Andean (G2)	RD MOTT	Vine	East Africa	HBB resistant;ALS resistant;Disease index resistant;High yield Roza
415	ADP738	MW-23	MW-23	NO	Africa	.	.	.	0	0.9979	0.0021	Andean (G2)	RD MOTT	Vine	East Africa
416	ADP739	MW-24	MW-24	NO	Africa	.	.	.	0	0.882	0.118	Andean (G2)	TAN/PUR	Bush	East Africa	HBB resistant;Disease index resistant;High yield SA;High yield Roza
417	ADP740	MW-25	MW-25	NO	Africa	.	.	.	0	0.9288	0.0712	Andean (G2)	RD MOTT	Vine	East Africa	HBB resistant;Rust resistant;ALS resistant;Disease index resistant
418	ADP741	PI638823	PI638823	NO	Africa	.	Tanzania	.	0	0.91	0.09	Andean (G2)	NA	Bush	East Africa
419	ADP742	PI661755	PI661755	NO	Africa	.	Tanzania	.	0.001	0.999	0	Andean (G2)	NA	Vine	East Africa	High yield SA
420	ADP743	PI638811	PI638811	NO	Africa	.	Tanzania	.	0.0017	0.9833	0.015	Andean (G2)	NA	Vine	East Africa
421	ADP744	PI638818	PI638818	NO	Africa	.	Tanzania	.	0	1	0	Andean (G2)	NA	Vine	East Africa	High yield Roza
422	ADP745	W616496	W616496	NO	Africa	.	.	.	0	1	0	Andean (G2)	NA	Vine	East Africa
423	ADP746	PI661774	PI661774	NO	Africa	.	Tanzania	.	0	0.9463	0.0537	Andean (G2)	NA	Vine	East Africa
424	ADP747	PI638816	PI638816	NO	Africa	.	Tanzania	.	0	1	0	Andean (G2)	red	Vine	East Africa	drought;High yield Roza
425	ADP748	PI661756	PI661756	NO	Africa	.	Tanzania	.	0	0.961	0.039	Andean (G2)	NA	Vine	East Africa	drought
426	ADP750	W616493	W616493	NO	Africa	.	.	.	0.0011	0.9989	0	Andean (G2)	NA	Bush	East Africa
427	ADP751	W616550	W616550	NO	Africa	.	.	.	0	0.992	0.008	Andean (G2)	NA	Bush	East Africa	Rust resistant;Disease index resistant
428	ADP752	PI321119	PI321119	NO	Africa	.	Tanzania	T	0.0002	0.9998	0	Andean (G2)	NA	Vine	East Africa	Rust resistant;drought;High yield SA;High yield Roza
429	ADP753	PI146757	PI146757	NO	Africa	.	Tanzania	T	0	0.673	0.327	Andean (G2)_Admixtured	NA	Bush	East Africa
430	ADP754	PI661779	PI661779	NO	Africa	.	Tanzania	.	0.0005	0.9995	0	Andean (G2)	NA	NA	East Africa
431	ADP757	Pasi	Pasi	NO	Africa	.	.	.	0.001	0.979	0.02	Andean (G2)	small-med	NA	East Africa
432	ADP758	Kabinima	Kabinima	NO	Africa	.	.	.	0	0.875	0.125	Andean (G2)	red mottled	NA	East Africa
433	ADP759	Urafiki	Urafiki	NO	Africa	.	.	.	0.001	0.999	0	Andean (G2)	red	NA	East Africa
434	ADP760	Wanja	Wanja	NO	Africa	.	.	.	0	1	0	Andean (G2)	lt brown	NA	East Africa
435	ADP761	Uyole-04	Uyole-04	NO	Africa	.	.	.	0	0.83	0.17	Andean (G2)	lt yellow	NA	East Africa
436	ADP762	Uyole-84	Uyole-84	NO	Africa	.	.	.	0	0.0006	0.9994	﻿Middle-American	lt tan	NA	East Africa
437	ADP763	Punda	Punda	NO	Africa	.	.	.	0	1	0	Andean (G2)	kablanketi	NA	East Africa	landrace with bruchid resistance
438	ADP764	Kalubungula	Kalubungula	NO	Africa	.	.	.	0	1	0	Andean (G2)	dark red	NA	East Africa	landrace with bruchid resistance
439	ADP765	KK25/KK73/3/666/5-L7	KK25/KK73/3/666/5-L7	NO	Africa	.	.	.	0	1	0	Andean (G2)	red	NA	East Africa	K25=Malawian landrace with bruchid resistance
440	ADP766	KK25/Nagaga-2	KK25/Nagaga-2	NO	Africa	.	.	.	0.0001	0.9978	0.0021	Andean (G2)	dark red	NA	East Africa	K25=Malawian landrace with bruchid resistance
441	ADP767	ACUG10-D3	ACUG10-D3	NO	North America	.	.	.	0.001	0.81	0.189	Andean (G2)	Drk. Red kidney	NA	N American
442	ADP768	ACUG12-D1	ACUG12-D1	NO	North America	.	.	.	0.0002	0.9784	0.0214	Andean (G2)	Drk. Red kidney	NA	N American
443	ADP769	ACUG12-C1	ACUG12-C1	NO	North America	.	.	.	0	1	0	Andean (G2)	Cranberry	NA	N American
444	ADP770	ACUG12-C2	ACUG12-C2	NO	North America	.	.	.	0	1	0	Andean (G2)	Cranberry	NA	N American
445	ADP771	ACUG13-C1	ACUG13-C1	NO	North America	.	.	.	0	1	0	Andean (G2)	Cranberry	NA	N American
446	ADP772	ACUG12-L2	ACUG12-L2	NO	North America	.	.	.	0	0.9059	0.0941	Andean (G2)	LRK	NA	N American
447	ADP773	ACUG13-L1	ACUG13-L1	NO	North America	.	.	.	0	0.883	0.117	Andean (G2)	LRK	NA	N American
448	ADP774	ACUG13-L2	ACUG13-L2	NO	North America	.	.	.	0.0006	0.8765	0.1229	Andean (G2)	LRK	NA	N American
449	ADP776	Dynasty	Dynasty	NO	North America	.	Canada	.	0	0.8679	0.1321	Andean (G2)	Drk. Red kidney	NA	N American
450	ADP777	AC-Darkid	AC-Darkid	NO	North America	.	Canada	.	0.0008	0.9184	0.0808	Andean (G2)	Drk. Red kidney	NA	N American
451	ADP778	Yeti	Yeti	NO	North America	.	.	.	0.001	0.887	0.112	Andean (G2)	WK	NA	N American
452	ADP779	CDC-Sol	CDC-Sol	NO	North America	.	Canada	.	0	1	0	Andean (G2)	Yellow	NA	N American
453	ADP780	L11YL002	L11YL002	NO	North America	.	.	.	0	1	0	Andean (G2)	Yellow	NA	N American
454	ADP781	L11YL012	L11YL012	NO	North America	.	.	.	0	1	0	Andean (G2)	Yellow	NA	N American
455	ADP782	L12LK007	L12LK007	NO	North America	.	.	.	0.0009	0.8711	0.128	Andean (G2)	LRK	NA	N American
456	ADP783	PS03-001-5-1-B3	PS03-001-5-1-B3	NO	North America	.	.	.	0.002	0.998	0	Andean (G2)	Cranberry	NA	N American
457	ADP784	PS11-006C-8-B	PS11-006C-8-B	NO	North America	.	.	.	0	0.962	0.038	Andean (G2)	Cranberry	NA	N American
458	ADP785	PS11-006C-1-B	PS11-006C-1-B	NO	North America	.	.	.	0	0.915	0.085	Andean (G2)	Cranberry	NA	N American
459	ADP786	USCR-14	USCR-14	NO	North America	.	.	.	0	0.9244	0.0756	Andean (G2)	Cranberry	NA	N American
460	ADP788	Snowdon	Snowdon	NO	North America	MSU-Kelly	United States	.	0	1	0	Andean (G2)	Wkidney	NA	MSU-Kelly
461	ADP789	PR0313-3	PR0313-3	NO	Caribean	UPR-Beaver	Puerto Rico	.	0	1	0	Andean (G2)	Pink striped	NA	UPR-Beaver
462	ADP790	PR0633-10	PR0633-10	NO	Caribean	UPR-Beaver	Puerto Rico	.	0	0.9925	0.0075	Andean (G2)	Red mottled	NA	UPR-Beaver
463	ADP791	PR1146-123	PR1146-123	NO	Caribean	UPR-Beaver	Puerto Rico	.	0	0.961	0.039	Andean (G2)	Yellow	NA	UPR-Beaver
464	ADP792	PR1146-124	PR1146-124	NO	Caribean	UPR-Beaver	Puerto Rico	.	0	0.9615	0.0385	Andean (G2)	Yellow	NA	UPR-Beaver
465	ADP793	08SH-840	08SH-840	NO	Caribean	TARS	Puerto Rico	.	0.001	0.764	0.235	Andean (G2)	Cranberry	NA	ARS-Porch
466	ADP794	Sederberg	Sederberg	NO	Africa	ARC	South Africa	.	0	0.872	0.128	Andean (G2)	Cranberry	Vine	ARC-Fourie	Bred for ALS resistance
467	ADP796	RS 6	RS6	NO	Africa	ARC	South Africa	.	0	0.8954	0.1046	Andean (G2)	Cranberry	Vine	ARC-Fourie
468	ADP798	Kamiesberg	Kamiesberg	NO	Africa	ARC	South Africa	.	0.001	0.891	0.108	Andean (G2)	Cranberry	Vine	ARC-Fourie	ALS resistant;HBB resistant;Rust resistant;Disease index resistant

## Sheet: Table S2
Table S2. Phenotypic reactions collected from ADP lines for BBS, CBB, and HBB bacterial diseases.
	BBS		CBB						HBB
ADP#	BBS_Potch	BBS_Mburg	CBB_LskF_2014	CBB_LskP_2014	CBB_PR_Xa3353	CBB_PR_Xa484A	CBB_Potch_ZM4	CBB_Lsk_2018	HBB_Potch
ADP001	NA	NA	NA	NA	9	6	4	3	5
ADP002	NA	NA	6	4.5	9	8.5	9	7.5	NA
ADP003	5	3	6	5.5	9	8.3	8	7	7
ADP004	7	3.67	6	5.5	9	8.5	8	8	7.7
ADP005	5.67	3.33	5.5	4.5	8.5	6.3	8	5	6.3
ADP006	6	4	5.5	5.5	9	8	8.33333	4.5	6.7
ADP007	5.33	4.67	5	4.5	9	7.8	5	3.5	6
ADP008	3	1.67	NA	NA	9	8.3	NA	NA	4
ADP009	4.67	2	NA	NA	9	7.8	NA	NA	4.7
ADP010	NA	NA	5.5	5.5	9	8.3	7	4.5	8
ADP011	5.33	2	5	4.5	8.8	7	7.33333	6.5	6.3
ADP012	4.33	5	NA	NA	8.8	8	7.66667	7	6
ADP013	6.33	5.67	6	4.5	9	8.5	8	5.5	8
ADP014	5.67	3	4	3	9	7.8	5	4.5	7.3
ADP015	5	3	5.5	5.5	9	8.5	8.33333	7.5	7.3
ADP016	5.67	4	5.5	4.5	9	8.5	5.66667	7.5	7
ADP017	5	3	6.5	6	8.8	8.3	8	7	6.7
ADP018	4	2.67	5.5	6	8.8	8	8.66667	7	6
ADP019	5.67	5	8	5.5	9	8.3	8.5	6.5	NA
ADP020	NA	NA	6.5	6.5	9	8.3	7	7.5	NA
ADP021	4.33	5	5.5	5.5	9	8	6.66667	7.5	7.7
ADP022	5.67	5.67	7	6	9	7.8	5	7.5	5.7
ADP023	5	3	4.5	4	9	8	7.66667	7	6.7
ADP024	6	3	4.5	4	9	8.8	7	7.5	NA
ADP025	5.67	5.33	5	4.5	8.8	8.3	7.33333	5.5	6.7
ADP026	6	7	6	6	9	8	7.66667	8	7.7
ADP027	5	4.33	NA	NA	9	7.8	8.33333	5.5	7.3
ADP028	5	3.33	4	3.5	8.3	7.3	5.66667	4	7
ADP029	5	4	4	4	8.8	8.3	6.66667	3.5	7
ADP030	5	3.33	3.5	4.5	9	8.5	7	3.5	4
ADP031	5.67	5	6	5.5	9	8.5	8.5	7.5	7.3
ADP032	4.33	3.33	5	5.5	4.8	2.5	3.33333	3	6.3
ADP033	4.67	5	5.5	4.5	9	8.8	8.33333	7	7.3
ADP034	5.67	7	7	5	9	8.5	6.66667	6.5	7
ADP035	4.33	1.67	NA	NA	9	7.8	NA	2.5	4.7
ADP036	2.33	4	NA	NA	9	9	NA	1	4.7
ADP037	5	3	3	4.5	9	8.3	9	4.5	7.7
ADP038	4.67	1.33	5	6	9	8.5	6.66667	7	8
ADP041	5.33	2.33	4.5	3	9	8.8	6.66667	4	5.3
ADP042	5	1.67	3	2.5	9	8	4.66667	3	6
ADP043	4.67	2.67	NA	NA	9	8	7	NA	6
ADP044	5.33	2.67	3	4	9	8.8	8.33333	3.5	7.3
ADP045	5.33	4.33	6	5	9	8.8	8.66667	5.5	5.7
ADP046	5.33	5.67	NA	NA	8.8	8.3	7	NA	7
ADP047	NA	NA	5	3.5	8.8	7.8	7.66667	4.5	6.7
ADP048	4.67	3	NA	NA	9	9	8	NA	6.3
ADP049	5.67	3	NA	NA	8.8	8	8.33333	NA	7.7
ADP050	5.33	2.67	NA	NA	9	8	8.66667	NA	6.7
ADP051	5.67	3.67	4.5	4.5	9	8.8	9	8	5.3
ADP052	5.33	2.67	NA	NA	9	8.8	7.5	NA	5.3
ADP053	5.67	3.33	NA	NA	9	9	8.33333	NA	6.7
ADP054	5	2.67	NA	NA	9	8.3	5.33333	NA	6.3
ADP055	4.33	2	5	4	9	8.5	8	3	4
ADP056	5	2	NA	NA	9	8.5	4.33333	NA	4.7
ADP057	4.33	1.67	6	3.5	9	8.5	8.5	4	6
ADP058	5.67	2.67	NA	NA	9	7.5	7.66667	NA	5.7
ADP059	5.33	4.33	NA	NA	9	8.5	8.5	NA	6
ADP060	5	2.33	NA	NA	9	8.5	4	NA	5.3
ADP061	5.33	2.67	3.5	3.5	9	8.5	7.33333	4.5	4.3
ADP062	5	2.33	NA	NA	9	8.5	8	NA	5.3
ADP063	6	3.33	NA	NA	8.8	8.3	4.33333	NA	5
ADP064	5	2.67	4	4.5	9	9	8	4	5.7
ADP065	5.33	2.67	NA	NA	9	8	7.33333	NA	6
ADP066	5	4.33	4	3	9	9	3.33333	4	7.3
ADP067	5.67	5.67	NA	NA	9	8	7.33333	NA	8
ADP068	NA	NA	NA	NA	9	8.5	7.33333	NA	NA
ADP069	5.67	3.67	NA	NA	9	8.3	9	NA	5.7
ADP070	4.67	2.33	NA	NA	9	8	7	NA	6.7
ADP071	5.33	2.33	3.5	3	8.8	7.8	8	3	NA
ADP072	5.67	3	4.5	4.5	9	8.8	9	3.5	NA
ADP073	NA	NA	5	5.5	9	8.3	8	6	NA
ADP074	5.33	2.67	NA	NA	9	8.3	8	NA	5.7
ADP075	5.33	2.67	NA	NA	9	8	8.5	NA	6.3
ADP076	5	2.67	NA	NA	9	9	8.5	NA	5
ADP077	5	2.67	NA	NA	9	8.8	NA	NA	6
ADP078	5.67	3	NA	NA	9	8.8	8.33333	NA	7.7
ADP079	1.33	3	NA	NA	9	8	7	NA	NA
ADP080	NA	NA	2.5	3	9	8.5	8	5.5	3
ADP081	5	3	6.5	4	9	8	7.5	7	4.3
ADP082	4.67	3	NA	NA	9	8.5	8	NA	3.7
ADP083	4.67	2.67	NA	NA	9	8.8	8	NA	5.7
ADP084	7	2.67	NA	NA	9	9	8.33333	NA	2.7
ADP085	5.33	3.33	NA	NA	9	8	8	NA	6.3
ADP086	5.33	2.67	NA	NA	9	9	7.33333	NA	5
ADP087	5	3	NA	NA	9	8.8	8.33333	NA	5.3
ADP088	5	2.67	NA	NA	9	8.3	8.66667	NA	4.7
ADP089	4.67	4.33	4.5	4.5	9	8.8	9	7	4.3
ADP090	6	7.33	5.5	4	9	8.5	8.66667	7.5	6.3
ADP092	5.67	3.67	4	4.5	9	9	8	6.5	5.7
ADP093	6	1.67	NA	NA	9	8.8	7.66667	NA	NA
ADP094	6	3.33	5.5	5	9	8.5	9	7	5.8
ADP095	6.33	2.33	NA	NA	9	8.3	9	NA	6.7
ADP096	5.67	4.33	NA	NA	5.5	2.8	3.5	4	5.3
ADP098	2.67	2.67	NA	NA	6.5	4.3	8.33333	3	6.3
ADP099	6	2.33	NA	NA	9	8.8	4.66667	6	6.3
ADP100	5.67	5	NA	NA	9	8	7	5.5	6
ADP101	5	5.67	6.5	5.5	9	8.8	9	8	7
ADP102	6	6.33	6.5	5	9	8	8.33333	7	7.3
ADP103	5	5.67	4.5	4.5	8	5.8	4.5	4.5	6.7
ADP104	NA	NA	NA	NA	9	8.3	NA	NA	NA
ADP105	5	3.33	4	3	6.8	4.8	4	3.5	5.7
ADP106	6	6.67	6.5	3	9	8	8	5.5	6
ADP107	5.33	5.33	4	4	9	8.5	9	4.5	NA
ADP108	5	3	3.5	4.5	9	7.8	6.66667	7	6.7
ADP109	5.67	3	5.5	4.5	9	8	4	6.5	4
ADP110	2.67	2.33	NA	NA	9	8.8	8	4.5	5
ADP111	7	2.33	4.5	4	9	8.5	4.33333	3	NA
ADP112	NA	NA	5	4.5	9	7.3	6	3.5	6.7
ADP113	1.67	1.67	1.5	1	7.5	3.5	3	1.5	4
ADP114	NA	NA	NA	NA	9	8.5	7	2	3
ADP115	NA	NA	NA	NA	9	8	8	2.5	4.7
ADP117	2	3.33	1.5	1.5	9	8	7	2	4
ADP118	1.67	2	1	1	5.8	2.5	2.5	1	2
ADP119	5.67	2.67	1.5	1	9	7.5	8	2.5	4
ADP120	1	2.33	NA	NA	6.8	3	5	1.5	3
ADP121	1.67	2.67	NA	NA	6.5	4.5	5.5	1	1.7
ADP122	2	2	NA	NA	7.3	4	6	NA	3.3
ADP123	3	2.33	3.5	3	9	8.3	NA	2.5	3.3
ADP124	NA	NA	2.5	2.5	9	8.5	3.66667	2.5	NA
ADP166	3	2.67	NA	NA	9	7.8	NA	NA	5
ADP168	NA	NA	NA	NA	NA	NA	NA	NA	6.3
ADP180	6.33	6.33	NA	NA	NA	NA	NA	NA	8
ADP183	5.33	4.33	NA	NA	NA	NA	NA	NA	7.3
ADP186	5	3.33	3.5	3	9	8.8	5.66667	3	7.3
ADP188	6.67	6.33	5.5	5.5	9	8.5	NA	7	8.3
ADP190	5.67	3.33	NA	NA	9	8.3	NA	NA	7.3
ADP196	NA	NA	NA	NA	9	8.8	NA	NA	NA
ADP205	2.67	3.33	4	3.5	9	8	7.5	7	6
ADP206	5.33	3.33	3	4	9	8.5	NA	6	6.3
ADP207	7	7.33	6	4.5	9	8.5	6.5	7	8.7
ADP208	5.33	4.33	5	4.5	9	8.3	NA	7.5	6.3
ADP211	3	2	NA	NA	9	9	NA	NA	4.3
ADP212	5.67	4.33	4	4.5	9	8.5	7.5	6	6.7
ADP213	5.67	3.33	4.5	4	9	8	8.5	4	6.3
ADP214	5	3.67	2.5	2.5	9	8.3	8.33333	2.5	7.7
ADP220	7	5.33	6	4.5	8.8	8.8	NA	7	8
ADP224	6	6.33	2	3.5	9	8	NA	3.5	6.7
ADP225	4.67	4.67	4.5	3.5	6.5	3.5	4	6	5
ADP232	3	5.67	NA	NA	9	7.5	6.33333	7	6.7
ADP242	6	7	NA	NA	8.3	8	7.5	6	7.7
ADP247	5	1.67	NA	NA	9	8.8	8.33333	NA	7.7
ADP267	5.67	4.33	NA	NA	9	8.8	NA	NA	6.7
ADP269	5	4.33	6	3.5	9	8.5	9	7	7.7
ADP271	7	7	NA	NA	NA	NA	NA	NA	8
ADP272	5	4	NA	NA	9	8	NA	NA	4
ADP277	7	5.67	6	4.5	9	8.3	8	7	8
ADP279	6.67	6.33	NA	NA	NA	NA	NA	NA	5.3
ADP280	7	4	6	3.5	9	8.8	NA	7.5	8
ADP288	7	7	NA	NA	9	7.8	NA	NA	8
ADP303	6	5.67	6.5	7	9	8	9	8.5	7.7
ADP310	8.33	7	5.5	6.5	9	7.5	7	9	9
ADP324	5	4.33	NA	NA	9	7.5	9	NA	NA
ADP345	5	4.33	NA	NA	9	8.5	NA	NA	6.3
ADP346	NA	NA	NA	NA	NA	NA	NA	NA	5.3
ADP350	NA	NA	NA	NA	9	8.5	NA	NA	NA
ADP353	NA	NA	5	5	8.8	7.3	NA	6	6.3
ADP354	7	5	5	4	9	8.5	NA	6	7.3
ADP366	NA	NA	NA	NA	9	8.8	NA	NA	NA
ADP367	5.33	3.33	NA	NA	9	9	8	7.5	6.7
ADP368	4.67	2.33	4.5	4.5	9	8.3	6	2	5.3
ADP376	6	7	5	4	9	8.5	9	7.5	8.3
ADP383	7	3.67	NA	NA	9	8.3	6	NA	7.3
ADP390	NA	NA	5	4.5	9	7.3	8	6	8.3
ADP391	6	6.67	5	4.5	9	8.5	7	5.5	7.7
ADP392	5.67	3.33	5	4.5	9	8	5.33333	6.5	7
ADP395	NA	NA	NA	NA	9	8	NA	3.5	4
ADP413	6	3	NA	NA	9	8.3	NA	NA	7.3
ADP417	6	5.67	5.5	5	9	9	7.5	7	8.3
ADP428	6	4.67	3	1	8.5	7.8	7.5	NA	2.8
ADP429	3	5	3	4.5	9	7.8	4.33333	4	NA
ADP430	6.33	3.67	2	2	4.5	2.5	4.33333	4	4
ADP431	5.33	5.33	8	5	9	7.8	3.33333	7	6.7
ADP432	1	2.33	NA	NA	4.5	2.5	3	NA	3
ADP434	NA	NA	4	3.5	6.3	3.3	7	5.5	5
ADP435	7	4.67	5	4.5	4.3	2.8	5.5	5.5	5.3
ADP436	NA	NA	NA	NA	5.8	3.3	6	4.5	6.7
ADP437	NA	NA	4	2.5	9	7.5	6	5.5	7
ADP442	4.67	2.67	2	2	9	9	NA	6.5	4
ADP447	4.67	1.67	NA	NA	9	6	NA	NA	6
ADP449	5	4	NA	NA	9	8.8	NA	NA	7
ADP450	4.67	5.33	NA	NA	9	9	NA	6.5	6.7
ADP454	2.67	2	NA	NA	9	7.5	7.66667	NA	2.7
ADP455	1.33	2.33	NA	NA	9	8	NA	NA	5
ADP456	2.67	2.67	NA	NA	9	7.5	NA	NA	6.7
ADP457	5	4.67	NA	NA	9	8.5	4	NA	5.3
ADP458	5.33	2.67	NA	NA	9	8.5	NA	NA	6
ADP459	6.33	6	NA	NA	9	8.5	NA	7.5	8.3
ADP460	6.33	6.33	4.5	4.5	9	8.3	7.5	6.5	7.7
ADP463	NA	NA	7	4	9	8.5	NA	7	NA
ADP464	6	4.33	NA	NA	NA	NA	NA	NA	7.7
ADP466	5.33	4	7.5	7	9	8.3	NA	6	7.7
ADP467	7	4.67	6.5	5.5	9	8.3	8	7	7.7
ADP468	6	5.33	5.5	5.5	9	8.5	6.5	7	6.3
ADP469	6	2.67	7	5	9	8.8	NA	6.5	7.7
ADP470	5.33	4.33	5	5	8.8	7.5	5.5	7	6.3
ADP474	3	3	6	5	9	8.5	7.66667	5.5	NA
ADP475	6	3.67	5.5	5	9	8.3	3	5	6
ADP476	5.67	1.67	4	4	9	7.8	6	4.5	5.7
ADP477	NA	NA	4	3.5	8.8	7	3.33333	4	NA
ADP478	6	5.67	NA	NA	9	9	8	NA	6
ADP479	6	6	3	3	9	8	NA	4	6
ADP480	NA	NA	5	6	9	8.3	NA	6.5	7.7
ADP481	6	6.33	3	4	9	8.5	6	1	5.3
ADP482	6	5.33	6.5	5.5	9	8	NA	6.5	5.7
ADP483	5.33	4.33	5	4	9	7.5	5.66667	5	6.7
ADP508	5	2.33	NA	NA	9	9	9	NA	3.3
ADP509	NA	NA	5	5	9	8	NA	6	NA
ADP510	4	1.33	NA	NA	9	7.5	6.66667	NA	4.2
ADP511	NA	NA	NA	NA	9	8.5	8.5	NA	NA
ADP512	5	3.67	6.5	6	9	7.8	NA	6.5	NA
ADP513	5.33	3.67	5	2.5	9	8	7.5	2.5	5
ADP514	4.67	2.33	NA	NA	9	8	8.66667	NA	NA
ADP515	6	3.33	4	5	9	8	8	6	NA
ADP516	5.67	3.67	NA	NA	9	8	7	NA	5.7
ADP518	5	3	4	3	9	8.3	7.33333	4.5	5.7
ADP519	NA	NA	5.5	4.5	9	8.3	NA	4	8
ADP520	4.33	2.67	4.5	4	9	8.8	NA	2.5	4.3
ADP521	5	3.33	3.5	3.5	9	7.5	NA	2	6.2
ADP523	5.33	5	1.5	2	9	8	8.5	2	5.3
ADP524	5.67	5.67	NA	NA	NA	NA	NA	NA	7.7
ADP525	7	4.67	NA	NA	NA	NA	NA	2.5	7
ADP526	NA	NA	NA	NA	NA	NA	NA	NA	2.7
ADP527	5	4.67	NA	NA	NA	NA	NA	NA	4.7
ADP528	5.33	3	NA	NA	NA	NA	NA	NA	6
ADP529	4.67	3.67	NA	NA	NA	NA	NA	NA	6
ADP530	6	3.33	NA	NA	NA	NA	NA	3	5
ADP531	4.67	2	NA	NA	NA	NA	NA	NA	4
ADP532	2.67	2.67	NA	NA	NA	NA	NA	NA	5.3
ADP534	6	5.67	NA	NA	NA	NA	NA	NA	6.7
ADP535	5.33	3.33	NA	NA	NA	NA	NA	NA	5.7
ADP537	3.33	2.33	NA	NA	NA	NA	NA	NA	3.3
ADP538	2.33	2.33	NA	NA	NA	NA	NA	3.5	5.7
ADP539	NA	NA	NA	NA	NA	NA	NA	4.5	NA
ADP540	3	6.67	NA	NA	NA	NA	NA	NA	5.7
ADP541	NA	NA	NA	NA	NA	NA	NA	1.5	3.7
ADP543	7	4.67	NA	NA	NA	NA	NA	NA	8
ADP544	4.33	5.67	NA	NA	NA	NA	NA	NA	5
ADP545	4.67	2	NA	NA	NA	NA	NA	NA	4.7
ADP546	6	4.33	NA	NA	NA	NA	NA	5.5	8
ADP550	5.67	3.33	NA	NA	NA	NA	NA	NA	7
ADP551	5.33	1.33	NA	NA	NA	NA	NA	NA	4.3
ADP553	NA	NA	NA	NA	NA	NA	NA	3	6
ADP554	2	2.33	NA	NA	NA	NA	NA	3	5.7
ADP555	5	2.67	NA	NA	NA	NA	NA	NA	3.7
ADP556	2.67	3	NA	NA	NA	NA	NA	4	5.7
ADP557	5	6	NA	NA	NA	NA	NA	4	8
ADP558	NA	NA	NA	NA	NA	NA	NA	5	7
ADP559	5	1.67	NA	NA	NA	NA	NA	NA	6.7
ADP560	5.33	3	NA	NA	NA	NA	NA	NA	6.7
ADP561	5.33	2.67	NA	NA	NA	NA	NA	5.5	6.3
ADP562	4.67	4.33	NA	NA	NA	NA	NA	5	5.7
ADP564	4.67	2.67	NA	NA	NA	NA	NA	4	5.3
ADP566	6	3.33	NA	NA	NA	NA	NA	6.5	3
ADP567	5.33	2.33	NA	NA	NA	NA	NA	5	6
ADP568	NA	NA	NA	NA	NA	NA	NA	NA	NA
ADP569	NA	NA	NA	NA	NA	NA	NA	8	8
ADP570	4.67	4.67	NA	NA	NA	NA	NA	3.5	5.7
ADP571	4.67	4	NA	NA	NA	NA	NA	NA	6
ADP572	3	2.67	NA	NA	NA	NA	NA	5	3.3
ADP573	NA	NA	NA	NA	NA	NA	NA	NA	NA
ADP574	2.67	3.33	NA	NA	NA	NA	NA	NA	4
ADP575	5	5.33	NA	NA	NA	NA	NA	NA	6
ADP576	4.67	3.67	NA	NA	NA	NA	NA	NA	6.3
ADP578	6	7.33	NA	NA	NA	NA	NA	NA	8
ADP579	5.67	4.33	NA	NA	NA	NA	NA	NA	8
ADP580	5.67	4.33	NA	NA	NA	NA	NA	6.5	5.3
ADP581	4.67	7.67	NA	NA	NA	NA	NA	7	5.7
ADP582	NA	NA	NA	NA	NA	NA	NA	5	5.7
ADP583	5	3.67	NA	NA	NA	NA	NA	NA	7.3
ADP584	NA	NA	NA	NA	NA	NA	NA	NA	6.3
ADP585	5.33	6	NA	NA	NA	NA	NA	6	5.7
ADP586	4.67	4.33	NA	NA	NA	NA	NA	NA	5.3
ADP587	7.33	5	NA	NA	NA	NA	NA	3	8
ADP588	NA	NA	NA	NA	NA	NA	NA	7	6.7
ADP589	4.33	3	NA	NA	NA	NA	NA	3	5
ADP591	7	6.67	NA	NA	NA	NA	NA	5	8
ADP592	2	1.33	NA	NA	NA	NA	NA	NA	3
ADP595	5.33	8	NA	NA	NA	NA	NA	NA	6.7
ADP598	7.67	5.67	7	6	9	8.5	NA	8	9
ADP599	6.67	5.33	8	6	6.5	5.3	NA	7.5	5.7
ADP600	NA	NA	6	5.5	9	8.3	NA	7	NA
ADP601	5.33	5.67	8	5.5	8.8	7.8	7.33333	8.5	7
ADP602	6.67	7	8	7	9	8	NA	8.5	NA
ADP603	5.67	4.33	6	6	9	7.8	8	8	6.3
ADP604	6.67	6.33	6	6	9	7.8	NA	8	8
ADP605	7	5.67	5.5	4.5	5	3.3	6.33333	7	5.7
ADP606	7	7.33	6	5.5	8.8	7.8	NA	8	8.7
ADP607	NA	NA	5.5	8	4.8	3	3	6.5	8.3
ADP608	4.67	2.33	4.5	3	9	8	9	7	NA
ADP609	7	6.67	6.5	6	9	8.3	NA	8	8.3
ADP610	6.67	5	NA	NA	9	8.3	7	8	7.7
ADP611	6.33	5.33	6	5.5	9	8.3	NA	8	7.3
ADP612	4.33	3.67	3	3.5	9	8.5	6	7.5	6
ADP613	7	6.67	6	6	7.8	7	6.5	7.5	7.7
ADP614	NA	NA	4.5	3.5	4	3	4	7.5	5.7
ADP615	5	4	4.5	4.5	9	7.5	7.33333	7	5
ADP616	3	6.33	6.5	6	9	8.3	8	8	NA
ADP617	5	5	4.5	4.5	9	8	7.33333	7	NA
ADP618	6	5.33	6.5	6	8.5	7	6.5	NA	NA
ADP619	5.33	4.33	5.5	6	9	8.5	8	7	NA
ADP620	5.67	5.67	6	5.5	9	8.5	6	7	7.3
ADP621	5.67	2	2.5	2.5	9	8	7.5	5	5
ADP622	7	4.67	6	7	9	8	7.33333	7	8.3
ADP623	7	6.33	7.5	5.5	8.8	8.3	8.33333	9	9
ADP624	5.33	3.33	5.5	5	8.8	7.8	6.66667	5	7
ADP625	5.67	2.67	NA	NA	9	8.8	5	4.5	NA
ADP626	4.67	2.67	2	1	5.8	2.5	4.33333	1	5.3
ADP627	NA	NA	2	1	8.8	7.3	NA	5	NA
ADP628	NA	NA	4.5	4	9	7.5	8	5	6.7
ADP629	5	5	3.5	4	8.5	6	7	4.5	6.3
ADP630	5.67	3.33	2.5	4	8.8	8	7.33333	7	6.7
ADP631	4.67	7.33	5.5	6.5	3.3	2	3	7.5	4.7
ADP633	6	7	5.5	5.5	9	7.8	8	6.5	6.7
ADP634	6	7	6.5	5.5	9	8.3	5	7.5	8.3
ADP635	5	6.33	6	4	4	2.5	NA	4	6
ADP636	4.33	4.67	4.5	4.5	NA	NA	NA	8	5
ADP637	5	4	6.5	6.5	NA	NA	NA	5.5	6
ADP638	5.67	6.33	6	5	NA	NA	NA	6	8
ADP639	6	6	5	6.5	NA	NA	NA	8	5.3
ADP640	4.67	6	5	6	NA	NA	NA	6	7.3
ADP641	4.67	3.33	NA	NA	NA	NA	NA	NA	6.3
ADP642	6.67	4	NA	NA	NA	NA	NA	6.5	7.7
ADP643	NA	NA	5.5	5.5	NA	NA	NA	4	6
ADP644	3.33	7.67	7	6.5	NA	NA	NA	5	5.7
ADP645	5.67	5	5.5	5	NA	NA	NA	7	8
ADP646	4.67	3	6	4	NA	NA	NA	5.5	6
ADP647	4.33	3.67	8	6	NA	NA	NA	6.5	4.3
ADP648	7	2.67	6	4.5	NA	NA	NA	7	6.7
ADP649	5	7	5.5	6	NA	NA	NA	6.5	5
ADP650	5	6.33	6	5	NA	NA	NA	7	8
ADP651	NA	NA	6	6	NA	NA	NA	7	5.3
ADP652	6.67	8	5.5	4	NA	NA	NA	7.5	7
ADP653	5.33	5	3	2	NA	NA	NA	3.5	7
ADP654	4.67	3.33	5	5	NA	NA	NA	6.5	3.8
ADP655	5.67	7	8	6.5	NA	NA	NA	8	6.3
ADP656	7.33	4.33	5.5	4.5	NA	NA	NA	7	7.7
ADP657	6.67	6	6.5	6	NA	NA	NA	7	7.7
ADP658	6	4	5	6	NA	NA	NA	7.5	6.7
ADP659	7.33	7.67	6	7.5	NA	NA	NA	7	8.3
ADP660	6	4	7	6.5	NA	NA	NA	7	4.7
ADP661	5.33	5.33	4	4	NA	NA	NA	7	6.7
ADP662	6.67	6.67	2	2	NA	NA	NA	7	8
ADP663	5.33	6.67	NA	NA	NA	NA	NA	4	6.3
ADP664	6	5.67	7.5	6	NA	NA	NA	7	7.7
ADP665	5	5.33	2	1	NA	NA	NA	5	4.7
ADP666	5.33	5	6	5.5	NA	NA	NA	7.5	6.7
ADP667	NA	NA	4	5.5	NA	NA	NA	7	6.7
ADP668	5	6.33	NA	NA	NA	NA	NA	7.5	7.7
ADP670	5	6	6	6	NA	NA	NA	8	7.7
ADP672	7	7.33	5.5	5	NA	NA	NA	8	8
ADP673	6.33	6	6	6	NA	NA	NA	6.5	8.3
ADP674	6	7	6.5	5	NA	NA	NA	7	7.3
ADP675	5.33	7.33	5	4.5	NA	NA	NA	7	8
ADP676	NA	NA	7.5	6.5	NA	NA	NA	8	8.3
ADP677	4.67	5.67	5	5	NA	NA	NA	7.5	8
ADP678	4.33	5.67	NA	NA	NA	NA	NA	7	6.3
ADP679	6.67	7.33	7	6	NA	NA	NA	9	8
ADP680	4.67	5.67	6	6.5	NA	NA	NA	8	5.7
ADP681	4.67	3	NA	NA	NA	NA	NA	NA	6
ADP682	5.33	5.33	NA	NA	NA	NA	NA	4.5	7
ADP683	5	5.67	4	4.5	NA	NA	NA	2.5	7
ADP684	4.67	2.33	4	4.5	NA	NA	NA	5	7
ADP685	4.33	2.33	NA	NA	NA	NA	NA	NA	6.3
ADP686	5.33	6.33	NA	NA	NA	NA	NA	6	7.3
ADP687	NA	NA	7	5.5	NA	NA	NA	7	6
ADP701	NA	NA	NA	NA	NA	NA	NA	NA	NA
ADP702	NA	NA	NA	NA	NA	NA	NA	NA	NA
ADP703	NA	NA	NA	NA	NA	NA	NA	NA	NA
ADP704	NA	NA	NA	NA	NA	NA	NA	NA	NA
ADP707	NA	NA	NA	NA	NA	NA	NA	NA	NA
ADP708	NA	NA	NA	NA	NA	NA	NA	NA	NA
ADP710	NA	NA	NA	NA	NA	NA	NA	NA	NA
ADP711	NA	NA	NA	NA	NA	NA	NA	NA	NA
ADP715	NA	NA	NA	NA	NA	NA	NA	NA	NA
ADP716	1	2	NA	NA	NA	NA	NA	NA	2.3
ADP717	5	6.33	NA	NA	NA	NA	NA	NA	5
ADP718	4.33	2	NA	NA	NA	NA	NA	NA	6.3
ADP719	3	3.67	NA	NA	NA	NA	NA	NA	4.3
ADP720	2	2.67	NA	NA	NA	NA	NA	NA	4.3
ADP723	5	3.33	NA	NA	NA	NA	NA	NA	2.7
ADP724	5.33	3.33	NA	NA	NA	NA	NA	NA	5
ADP726	4	2	NA	NA	NA	NA	NA	NA	4.7
ADP727	3.33	2.33	NA	NA	NA	NA	NA	NA	5.7
ADP728	4	3	NA	NA	NA	NA	NA	NA	3.3
ADP730	4.67	2	NA	NA	NA	NA	NA	NA	3.5
ADP731	5	2.33	NA	NA	NA	NA	NA	NA	3
ADP732	5	2.33	NA	NA	NA	NA	NA	NA	3.3
ADP733	4.67	2.33	NA	NA	NA	NA	NA	NA	NA
ADP734	5	3	NA	NA	NA	NA	NA	NA	2.7
ADP735	2.33	1.67	NA	NA	NA	NA	NA	NA	3.7
ADP737	5	2	NA	NA	NA	NA	NA	NA	2.8
ADP738	NA	NA	NA	NA	NA	NA	NA	NA	4
ADP739	4.67	2.67	NA	NA	NA	NA	NA	NA	3.3
ADP740	1.67	1.67	NA	NA	NA	NA	NA	NA	3
ADP741	5	7	NA	NA	NA	NA	NA	NA	5.3
ADP742	5	2.33	NA	NA	NA	NA	NA	NA	7
ADP743	5.33	3	NA	NA	NA	NA	NA	NA	7.3
ADP744	2.67	2	NA	NA	NA	NA	NA	NA	5
ADP745	4.33	2.33	NA	NA	NA	NA	NA	NA	7
ADP746	5.67	6.33	NA	NA	NA	NA	NA	NA	6.7
ADP747	5.33	3.33	NA	NA	NA	NA	NA	NA	7
ADP748	4.33	3.33	NA	NA	NA	NA	NA	NA	4.7
ADP750	5.33	6.33	NA	NA	NA	NA	NA	NA	7.7
ADP751	7.33	5.33	NA	NA	NA	NA	NA	NA	4.7
ADP752	5.33	4	NA	NA	NA	NA	NA	NA	6.7
ADP753	5	6.33	NA	NA	NA	NA	NA	NA	5.3
ADP754	NA	NA	NA	NA	NA	NA	NA	NA	NA
ADP757	5.33	6.67	NA	NA	NA	NA	NA	NA	NA
ADP758	5.33	4.33	NA	NA	NA	NA	NA	NA	NA
ADP759	5.33	7.67	NA	NA	NA	NA	NA	NA	NA
ADP760	5.67	3.67	NA	NA	NA	NA	NA	NA	NA
ADP761	5	4.67	NA	NA	NA	NA	NA	NA	NA
ADP763	NA	NA	NA	NA	NA	NA	NA	NA	NA
ADP764	NA	NA	NA	NA	NA	NA	NA	NA	NA
ADP765	5.33	7	NA	NA	NA	NA	NA	NA	NA
ADP766	NA	NA	NA	NA	NA	NA	NA	NA	NA
ADP767	5.33	5.33	NA	NA	NA	NA	NA	NA	NA
ADP768	5.33	6.67	NA	NA	NA	NA	NA	NA	NA
ADP769	5	6.33	NA	NA	NA	NA	NA	NA	NA
ADP770	5	7.67	NA	NA	NA	NA	NA	NA	NA
ADP771	4.67	4.33	NA	NA	NA	NA	NA	NA	NA
ADP772	4.33	4	NA	NA	NA	NA	NA	NA	NA
ADP773	5	4.67	NA	NA	NA	NA	NA	NA	NA
ADP774	6.67	4.33	NA	NA	NA	NA	NA	NA	NA
ADP776	5	7	NA	NA	NA	NA	NA	NA	NA
ADP777	7	7	NA	NA	NA	NA	NA	NA	NA
ADP778	6	6.33	NA	NA	NA	NA	NA	NA	NA
ADP779	2.67	6.67	NA	NA	NA	NA	NA	NA	NA
ADP780	5.33	6.33	NA	NA	NA	NA	NA	NA	NA
ADP781	5.67	6.33	NA	NA	NA	NA	NA	NA	NA
ADP782	NA	NA	NA	NA	NA	NA	NA	NA	NA
ADP783	5	7	NA	NA	NA	NA	NA	NA	NA
ADP784	5.33	7	NA	NA	NA	NA	NA	NA	NA
ADP785	3	3.33	NA	NA	NA	NA	NA	NA	NA
ADP786	4.33	4.67	NA	NA	NA	NA	NA	NA	NA
ADP788	5	7.67	NA	NA	NA	NA	NA	NA	NA
ADP789	5.33	5.67	NA	NA	NA	NA	NA	NA	NA
ADP790	1	1.33	NA	NA	NA	NA	NA	NA	NA
ADP791	5	7	NA	NA	NA	NA	NA	NA	NA
ADP792	5	6.33	NA	NA	NA	NA	NA	NA	NA
ADP793	5.67	6	NA	NA	NA	NA	NA	NA	NA
ADP794	2.33	7	NA	NA	NA	NA	NA	NA	4.3
ADP796	1.67	2	NA	NA	NA	NA	NA	NA	4.3
ADP798	1	5	NA	NA	NA	NA	NA	NA	3

## Sheet: Table S3
Table S3. PCA of 444 ADP accessions genotyped with 2136 SNPs LD pruned
taxa	PC1	PC2	PC3
ADP001	-1.781	8.34256	-4.84232
ADP002	-2.0023	11.2745	-1.93929
ADP003	-3.93113	9.46559	-5.02128
ADP004	-2.59591	11.093	-2.41825
ADP005	-4.12332	9.63582	-4.77112
ADP006	-2.37785	12.0765	-2.90555
ADP007	-9.89704	0.0542041	-1.20303
ADP008	-4.06315	-14.1636	-1.42946
ADP009	10.9122	-4.2054	-2.46431
ADP010	-1.60635	11.4842	-1.49067
ADP011	-3.78868	9.24432	-5.08307
ADP012	-2.5664	12.2705	-2.87749
ADP013	-2.62233	10.8571	-3.83676
ADP014	-10.4898	1.22773	-2.2269
ADP015	-2.17179	10.8537	-2.47965
ADP016	-4.50947	9.17842	-5.07445
ADP017	-5.76445	4.94519	-2.20506
ADP018	-2.17562	9.73391	-2.13298
ADP019	-2.87828	9.79967	-3.65647
ADP020	-1.99343	10.7925	-3.90482
ADP021	-8.51883	1.02962	-3.01927
ADP022	-8.64215	3.13165	-4.49787
ADP023	-5.22759	6.33329	-5.16365
ADP024	-3.44807	8.36081	-2.63601
ADP025	-3.66949	11.0331	-5.70123
ADP026	-6.19003	5.69134	0.923069
ADP027	-5.1976	7.50763	-2.72375
ADP028	-3.90141	7.99788	-4.62321
ADP029	-4.17482	8.82794	-2.63215
ADP030	5.74304	-7.59833	4.27642
ADP031	-2.25909	11.8896	-2.25336
ADP032	8.1526	-0.779892	4.29923
ADP033	-12.6272	-3.95616	-1.79034
ADP034	-1.93361	11.1298	-1.91812
ADP035	11.4325	-6.14581	-4.34169
ADP036	12.5651	-6.09808	-4.72787
ADP037	-5.75183	6.87529	-0.834155
ADP038	-2.71647	11.1608	-1.95075
ADP041	-17.3553	-14.0249	0.482859
ADP042	-5.76353	7.61021	-1.5365
ADP043	-5.50022	7.0671	-2.44657
ADP044	-8.74175	-1.72425	-3.05376
ADP045	-5.64199	8.85018	-8.81779
ADP046	-4.57515	7.38215	-3.99554
ADP047	-3.41853	8.23819	-2.04362
ADP048	-5.77566	5.84681	-5.78806
ADP049	-5.47443	6.24022	-1.94578
ADP050	-3.82782	8.96258	-3.37651
ADP051	-13.5886	-4.19842	-4.97625
ADP052	-6.25171	8.05708	-8.74265
ADP053	-14.7699	-8.51935	-1.32167
ADP054	-7.72664	2.94847	-4.96528
ADP055	-11.9555	-3.76116	-1.61141
ADP056	-13.0741	-5.33884	-4.94822
ADP057	-12.4451	-2.76465	-1.93046
ADP058	-8.73408	2.55918	-6.33602
ADP059	-10.1685	2.7704	-7.18636
ADP060	-17.0318	-11.5233	-1.34008
ADP061	-11.2511	-2.26197	-4.05754
ADP062	-5.52263	5.84023	-3.90145
ADP063	-4.60201	6.89513	-8.74101
ADP064	-4.79782	7.63769	-4.62591
ADP065	-13.3074	-8.05033	-4.11975
ADP066	-17.848	-15.3641	-0.0825055
ADP067	-5.77816	5.45783	-4.09953
ADP068	-15.9768	-7.01119	-3.91044
ADP069	-11.5845	0.144993	-6.44959
ADP070	-6.63086	5.59508	-4.12101
ADP071	-9.76328	1.90407	-2.61062
ADP072	-13.4838	-7.40001	-3.15788
ADP073	-13.9407	-5.31504	-1.20462
ADP074	-10.4175	-1.20394	-5.50517
ADP075	-9.09016	3.10767	-2.34353
ADP076	-6.70827	5.22279	-7.82385
ADP077	10.4634	-0.230449	1.75829
ADP078	-9.80561	1.56876	0.139113
ADP079	-8.07147	3.29063	-1.2643
ADP080	-17.0734	-12.7249	-0.384367
ADP081	-8.64311	2.41971	-4.28806
ADP082	-6.64842	5.3345	-5.9396
ADP083	-3.91347	8.85201	0.816383
ADP084	-12.2581	-5.85628	5.64835
ADP085	-6.55371	5.3103	-5.26732
ADP086	-3.69779	7.13766	0.937961
ADP087	-4.12339	8.85791	-6.75548
ADP088	-4.35193	9.41504	-7.54877
ADP089	-4.99454	8.06638	-6.55852
ADP090	-2.83191	10.1819	-3.35391
ADP092	-11.2821	-1.11429	-3.18188
ADP093	-4.70473	7.33318	-5.77159
ADP094	-7.26506	4.08548	-3.40167
ADP095	-4.09367	6.84528	-3.65434
ADP096	-5.72975	6.55671	2.63546
ADP098	-7.38629	-0.783108	-2.30795
ADP099	-9.46875	-1.45646	-2.46312
ADP100	-6.4486	5.1811	-2.10508
ADP101	-7.14999	2.62288	-1.48365
ADP102	-10.9235	-1.62818	-1.89694
ADP103	-14.6111	-8.5352	-0.687094
ADP104	10.2679	-0.36426	-3.1813
ADP105	-4.78683	4.33727	-3.93604
ADP106	-9.60403	-0.129558	-2.90991
ADP107	-10.1573	0.873421	-3.35527
ADP108	-5.97997	4.16438	-3.26745
ADP109	-9.16968	2.82537	-6.52669
ADP110	-3.2263	7.08942	-3.67969
ADP111	-8.53442	-2.78722	-2.8885
ADP112	-6.0038	5.45447	-2.33762
ADP113	10.7815	-3.04312	3.50922
ADP114	-8.19128	1.6864	1.18279
ADP115	-6.42772	5.0189	2.28312
ADP117	-11.0816	-5.44625	1.53364
ADP118	-11.4903	-4.93073	-0.224829
ADP119	-4.40621	1.79873	-3.59092
ADP120	-5.27391	3.32279	0.74994
ADP121	10.3588	-2.29372	3.60552
ADP122	-15.1174	-5.25949	0.8101
ADP123	-18.6262	-17.1181	1.89179
ADP124	11.3828	1.20397	-3.06498
ADP166	-4.24084	-14.1849	1.19103
ADP168	7.10138	-3.7913	-0.0158859
ADP180	8.14432	-2.09114	-1.32056
ADP183	-5.57656	5.02188	-1.50338
ADP186	-3.62793	7.27275	-4.11185
ADP188	10.9378	0.943489	-2.72844
ADP190	11.1992	-0.346481	-3.06856
ADP196	12.5291	0.826388	0.606331
ADP205	-10.223	-4.57402	-2.79515
ADP206	10.9903	2.31202	1.56669
ADP207	-4.591	6.3754	2.51185
ADP208	11.1436	0.813342	-1.86522
ADP211	12.8609	-6.0132	-4.29668
ADP212	-13.9562	-7.69269	-1.66448
ADP213	-9.05937	0.00353721	-3.73036
ADP214	-11.7723	-2.96629	-3.11807
ADP220	9.56127	-1.16924	-0.218516
ADP224	10.5845	-0.806141	-1.19394
ADP225	-12.4056	-3.9076	8.05671
ADP232	-16.649	-12.9067	3.51199
ADP242	-4.55924	8.11978	-6.19291
ADP247	-12.9874	-7.3823	-0.544669
ADP267	10.7698	-3.20865	-2.12528
ADP269	-7.1059	0.579257	-1.42996
ADP271	11.5299	-1.6403	-3.38079
ADP272	12.8732	1.97091	0.480483
ADP277	-4.76349	6.64473	-1.03926
ADP279	9.01975	-2.16225	-1.05411
ADP280	8.87095	-2.12922	6.09562
ADP288	11.2088	-0.0964771	0.975675
ADP303	-7.26727	1.72146	0.130045
ADP310	-4.10864	5.25002	-0.798879
ADP324	-8.15729	2.70657	-0.609495
ADP345	11.1654	-5.92411	3.21457
ADP346	-10.6487	-2.42958	-2.90023
ADP350	10.7743	2.77359	-0.512277
ADP353	10.6998	0.0793447	-0.402825
ADP354	11.954	0.137045	-2.75659
ADP366	11.0395	2.14593	-2.90207
ADP367	-8.87884	4.17146	-0.0510478
ADP368	-4.05299	7.66891	-3.43031
ADP376	-9.66521	-0.637685	0.0270289
ADP383	-2.84247	8.13781	-1.88423
ADP390	-3.28862	9.10545	-2.09831
ADP391	-11.0326	-0.0273635	1.65966
ADP392	-1.20479	9.09928	-0.503921
ADP395	12.7428	-6.02786	-3.42307
ADP413	8.75941	-3.39868	-3.7143
ADP417	-3.28988	7.6733	-0.832718
ADP428	-17.3105	-13.9383	-0.271158
ADP429	-16.2792	-11.0655	0.638545
ADP430	-15.1185	-10.6967	-1.86243
ADP431	-12.816	-5.53094	-2.49022
ADP432	-13.0981	-8.96304	-1.57871
ADP434	-2.53798	4.81594	-3.24892
ADP435	3.94235	-6.56271	-2.34465
ADP436	9.65446	-0.557338	-4.97231
ADP437	-4.54682	6.99373	-4.5969
ADP442	-6.47654	-15.5209	-2.39121
ADP447	5.38262	-9.76576	-2.17896
ADP449	10.6998	0.236464	-1.90323
ADP450	8.04095	-0.624509	8.33002
ADP454	-7.01892	-2.42043	-3.84552
ADP455	11.3506	-3.53076	-2.06824
ADP456	7.60964	-3.47927	-0.764079
ADP457	-6.54672	-1.68256	-5.33005
ADP458	10.1241	-4.74198	-1.46424
ADP459	11.5572	1.04619	-0.910888
ADP460	-11.4454	-4.45261	-2.49626
ADP463	12.8066	0.789284	0.853464
ADP464	11.3273	0.274163	-0.662276
ADP466	12.1751	2.16663	-0.171866
ADP467	-11.0814	-3.06538	-1.1068
ADP468	-10.3603	-0.974089	-3.01561
ADP469	11.6125	0.287029	-0.474852
ADP470	-8.61399	2.57377	-4.37515
ADP474	-3.61552	8.126	-6.20732
ADP475	-12.2966	-8.04341	-2.56193
ADP476	5.60181	-3.46875	-2.87079
ADP477	-17.6086	-13.4374	-1.2963
ADP478	-9.3717	-1.41711	-4.3353
ADP479	7.67256	-2.62361	-2.48917
ADP480	11.0018	1.81538	0.259344
ADP481	-7.48035	-2.16277	-3.15298
ADP482	5.16921	-1.54432	1.12844
ADP483	-4.24299	7.2348	-4.57361
ADP508	-5.31151	7.80267	-6.80167
ADP509	-17.0705	-11.0694	0.860623
ADP510	-8.4045	1.48099	0.463465
ADP511	-14.4088	-4.68732	-1.36427
ADP512	8.81118	-1.04251	-0.230346
ADP513	-7.12787	4.10637	-1.56193
ADP514	-6.34652	5.17581	-2.77538
ADP515	-11.4016	-2.04124	-0.513396
ADP516	8.02476	-1.87084	-3.19322
ADP518	-2.92927	8.37843	-2.77699
ADP519	-0.498764	9.20641	-1.32058
ADP520	1.17471	-1.98969	-2.1175
ADP521	9.04351	0.820716	-1.67581
ADP523	-5.89174	5.94349	-3.73831
ADP524	11.6554	2.75128	-2.50736
ADP525	8.68846	-0.0960594	-1.70194
ADP526	-7.72435	-6.64023	-2.80828
ADP527	11.0479	-4.73858	2.26566
ADP528	12.8104	-5.26381	-4.2832
ADP529	12.087	-6.174	-3.76156
ADP530	10.6895	-0.550308	-1.16112
ADP531	9.58349	-5.8632	-2.00492
ADP532	8.68169	-7.91999	-0.0817285
ADP534	9.06506	2.2338	-1.94623
ADP535	12.7938	-5.56044	-4.3423
ADP537	8.32262	-3.87099	-2.80547
ADP538	7.70432	-6.74873	0.502549
ADP539	12.2996	-2.1713	-1.13313
ADP540	10.6204	-7.83669	-4.05651
ADP541	9.75004	-8.09399	-3.75358
ADP543	12.6326	1.98966	0.999144
ADP544	12.4684	-5.43546	-3.16766
ADP545	10.2364	-1.33019	2.6112
ADP546	3.73009	-7.93291	1.13012
ADP550	8.11386	-1.00155	8.82723
ADP551	-1.33309	-13.4021	-1.67823
ADP553	4.86339	-10.8409	-2.16788
ADP554	8.1029	-8.32145	-2.70091
ADP555	11.0592	-3.60364	-2.47307
ADP556	3.82868	-7.89464	-0.118523
ADP557	4.72029	-7.32848	-0.883273
ADP558	7.01717	-5.0057	0.435205
ADP559	8.37705	-4.26959	-0.060523
ADP560	10.3829	-2.92297	-0.849534
ADP561	10.859	0.391927	-0.519403
ADP562	2.33267	-7.23792	-2.22254
ADP564	9.75771	-1.6364	-1.51129
ADP566	5.76078	-7.99696	-3.82975
ADP567	7.82681	-9.25945	-3.56869
ADP568	-6.41242	-8.28656	2.14802
ADP569	-4.25371	-9.08543	3.36513
ADP570	-10.381	-14.2407	0.858478
ADP571	8.70622	-7.87677	-3.26631
ADP572	9.89858	-6.56739	-0.326179
ADP573	11.6758	3.27992	0.920131
ADP574	-15.4451	-15.6884	-0.784031
ADP575	-17.6228	-18.6086	1.51499
ADP576	4.25446	-9.03776	-1.34416
ADP578	9.32251	-6.03038	5.9666
ADP579	9.84528	-4.14145	5.97773
ADP580	5.55314	-4.56583	-0.00462477
ADP581	3.06292	-9.79108	0.115552
ADP582	10.8466	-0.735577	0.352765
ADP583	5.95565	-6.55613	-0.386739
ADP584	-6.66728	-7.46808	-1.63413
ADP585	12.1668	-0.467103	-1.50058
ADP586	11.6262	-0.721549	0.042233
ADP587	6.58808	-4.7933	5.62534
ADP588	3.08093	-7.93567	4.75028
ADP589	8.84711	0.501141	-0.131401
ADP591	10.6188	1.73533	4.24737
ADP592	11.1207	-2.19975	-1.67095
ADP595	9.98722	-0.0654447	-1.60717
ADP598	-4.64651	7.84013	7.32942
ADP599	5.72018	0.203773	11.2784
ADP600	-4.21786	7.02321	8.17258
ADP601	-17.8944	-13.8356	2.94866
ADP602	-4.39643	8.48827	6.3812
ADP603	-4.16787	7.7339	9.55907
ADP604	-8.10512	3.71985	5.38352
ADP605	-9.88395	0.153942	7.28707
ADP606	10.7937	2.63655	9.07078
ADP607	-2.30478	10.2706	9.36735
ADP608	-13.3699	-5.48411	-0.299152
ADP609	11.5523	1.68587	7.06613
ADP610	-13.4756	-7.18181	3.41003
ADP611	-2.30825	8.62859	-2.29803
ADP612	-5.01664	5.01671	-0.456417
ADP613	-4.11376	6.99189	12.9978
ADP614	-2.78648	8.89653	9.25788
ADP615	-6.41241	3.05534	7.25167
ADP616	-1.28512	10.9751	6.83389
ADP617	-0.477729	10.7311	-3.10153
ADP618	-2.56523	9.84731	10.7521
ADP619	-10.753	-2.03014	1.45816
ADP620	-0.837348	7.74361	1.14498
ADP621	-1.79222	6.92015	-2.64924
ADP622	-0.994783	9.27936	7.28503
ADP623	-2.53722	8.08976	10.0947
ADP624	-6.79713	5.10497	-0.299552
ADP625	-5.99881	4.61066	0.333559
ADP626	-16.8098	-17.1136	2.23514
ADP627	-3.05071	7.17985	7.71131
ADP628	-6.68491	1.38865	7.3698
ADP629	-1.58457	7.90935	7.21565
ADP630	-3.37045	7.77105	5.02337
ADP631	-16.4284	-10.3981	3.0942
ADP633	-7.29301	2.23752	8.86434
ADP634	-3.02494	8.33723	4.96486
ADP635	0.455379	-7.68766	9.58312
ADP636	-17.2877	-10.9096	2.52374
ADP637	-2.88075	8.91079	9.46522
ADP638	-10.621	-0.456219	10.0613
ADP639	-8.59514	4.22784	9.5221
ADP640	-6.71304	5.03515	6.71953
ADP641	-5.09817	5.95488	-0.756515
ADP642	-7.08143	0.248059	-3.22483
ADP643	-3.33893	7.34991	-1.04342
ADP644	-6.49546	4.86259	7.07743
ADP645	2.74555	-3.07292	6.16479
ADP646	-17.5326	-14.1715	-0.59669
ADP647	-7.77486	1.04392	13.0848
ADP648	-13.5651	-5.23935	4.10956
ADP649	-6.59498	5.43006	8.21514
ADP650	-2.42251	9.40157	6.33715
ADP651	-9.88646	0.79962	9.24062
ADP652	-5.17659	6.80648	6.70152
ADP653	-7.57717	2.90603	10.417
ADP654	-8.88519	0.479132	10.0193
ADP655	-7.19484	1.87809	13.1507
ADP656	-1.97043	8.76187	7.04616
ADP657	-6.6313	3.57348	6.49024
ADP658	-2.86692	10.2276	4.60032
ADP659	-6.475	7.21141	8.05177
ADP660	-6.40669	3.9808	-0.278069
ADP661	-3.42156	7.92436	-1.95465
ADP662	-2.00314	7.9016	1.02641
ADP663	-5.00406	7.04189	8.9037
ADP664	-2.52067	10.3308	10.7075
ADP665	-7.82079	3.60434	9.05562
ADP666	-6.78581	4.6732	6.56918
ADP667	-2.71499	-9.26962	4.85391
ADP668	9.24906	0.112681	-5.21948
ADP670	-5.64121	3.42115	10.8423
ADP672	-2.65517	8.97854	5.68831
ADP673	-13.5725	-7.621	3.65356
ADP674	-8.0731	-1.52737	7.29183
ADP675	-11.8936	-5.3069	0.339594
ADP676	-2.41887	11.7204	7.18484
ADP677	-2.596	7.8757	-4.36344
ADP678	-11.1666	-3.06444	-1.5895
ADP679	-3.76893	7.67389	10.3408
ADP680	-3.10895	8.67806	8.15049
ADP681	7.61182	-2.73244	-1.36626
ADP682	9.08233	-0.998852	1.99981
ADP683	9.8767	-0.725988	4.29792
ADP684	-15.6703	-18.2103	1.55092
ADP685	10.4285	-0.921319	-2.13238
ADP686	8.098	-3.38608	-2.37793
ADP687	5.75465	-4.32029	6.72293
ADP701	6.45775	-4.52963	-0.575848
ADP702	9.44377	-0.58504	-2.44874
ADP703	10.655	2.17183	-1.85855
ADP704	6.04045	-1.82957	3.15463
ADP707	6.78614	-5.62033	-4.70085
ADP708	11.1208	-1.0751	-1.29992
ADP710	9.88113	-0.278833	-3.27764
ADP711	11.7268	0.319345	-3.37917
ADP715	4.16318	-5.38902	7.27739
ADP716	9.62154	-5.9352	-2.46453
ADP717	11.6184	-2.3454	-1.63761
ADP718	12.0235	-4.8862	-3.95684
ADP719	10.5333	-4.94174	2.68393
ADP720	9.95186	-3.56606	3.8082
ADP723	2.9012	-11.9419	0.391052
ADP724	9.43899	-3.77027	2.74897
ADP726	9.09033	-4.30043	2.96193
ADP727	9.7805	-4.87181	2.85248
ADP728	6.64337	-2.80429	7.97417
ADP730	9.70025	-2.05172	-2.87477
ADP731	12.1216	-0.800581	-3.86886
ADP732	11.3356	-0.66296	-3.62573
ADP733	9.74509	-2.80165	-0.635276
ADP734	11.9443	-4.1159	-3.24438
ADP735	11.9654	-4.78786	-2.90033
ADP737	10.8472	-5.61361	-1.24217
ADP738	2.54273	-7.15578	-0.81663
ADP739	8.23689	-5.87611	0.0868739
ADP740	10.2708	-3.03523	-0.914957
ADP741	10.0699	-0.463439	-0.636478
ADP742	12.0783	2.59392	-0.637304
ADP743	10.0554	-0.197723	-3.0417
ADP744	11.4599	1.21093	-1.89052
ADP745	11.4435	2.33462	-1.71655
ADP746	9.94914	-0.428045	-0.67563
ADP747	11.7396	1.606	-1.87095
ADP748	10.5513	0.0388675	-3.11755
ADP750	11.9377	2.0564	-1.03114
ADP751	10.9349	-2.30478	-4.01625
ADP752	10.8922	0.519862	-4.90967
ADP753	4.22326	-6.00123	1.18249
ADP754	11.7398	-1.2527	-2.49931
ADP757	9.78774	-0.56775	-3.99574
ADP758	10.2324	-7.07477	-2.03951
ADP759	9.68705	0.399592	-4.17706
ADP760	11.0015	1.72918	-1.91156
ADP761	8.65221	-6.0605	-1.70101
ADP763	12.4698	1.76849	-0.15839
ADP764	11.9612	1.3638	-0.743932
ADP765	12.1281	1.91416	0.949057
ADP766	10.1503	-0.337997	5.46698
ADP767	7.59933	-1.52848	12.6563
ADP768	8.74817	-0.850249	8.22665
ADP769	10.3006	1.26103	-3.38593
ADP770	11.9089	0.789555	-3.76446
ADP771	11.365	1.94725	-2.6172
ADP772	10.1826	-0.988076	4.80362
ADP773	9.33911	-0.569724	11.6802
ADP774	9.33787	-0.388231	11.5681
ADP776	8.58213	-1.94513	12.182
ADP777	9.27933	-0.0668464	11.3524
ADP778	-0.284923	-10.5674	2.60936
ADP779	7.5849	-0.94042	-0.79567
ADP780	11.4751	1.47355	-0.510669
ADP781	11.6188	-0.556184	0.357116
ADP782	7.14345	-0.291137	8.77569
ADP783	11.8213	2.14893	-0.975429
ADP784	11.0621	0.936457	-1.8569
ADP785	9.46139	-0.0424399	-0.477148
ADP786	7.97304	-3.00428	-0.451138
ADP788	11.1953	1.91724	7.54603
ADP789	10.7349	-2.29325	-0.354194
ADP790	11.5492	-2.39885	-0.537213
ADP791	10.2058	-3.50271	-1.4863
ADP792	9.87428	-5.09338	-1.73408
ADP793	6.58139	-2.34853	8.15271
ADP794	10.1289	-2.87384	3.57469
ADP796	10.1114	-1.56263	0.490984
ADP798	8.26339	-3.03412	2.55296
